1     **Impact of Direct Acting Antivirals on Survival in Patients with Chronic Hepatitis C and**  
2                                             **Hepatocellular Carcinoma**

3  
4     **William M. Kamp<sup>1</sup>, Cortlandt M. Sellers<sup>1</sup>, Stacey M. Stein<sup>2,4</sup>, Joseph K. Lim<sup>3</sup>, Hyun S.**  
5                                             **Kim<sup>1,2,4</sup>**

6         1. Division of Interventional Radiology, Department of Radiology and Biomedical Imaging,  
7             Yale School of Medicine, 330 Cedar Street, New Haven, CT 06510, USA

8         2. Division of Medical Oncology, Department of Internal Medicine, Yale School of  
9             Medicine, 330 Cedar Street, New Haven, CT 06510, USA

10        3. Section of Digestive Diseases and Yale Liver Center, Yale School of Medicine, 330  
11            Cedar Street, New Haven, CT 06510, USA

12        4. Yale Cancer Center, Yale School of Medicine, New Haven, CT 06510, USA

13  
14     **Corresponding Author:**

15     Hyun S. Kim, MD

16     Yale School of Medicine

17     Yale Cancer Center

18     789 Howard Ave, TE 2-224

19     New Haven, CT 06519

20     Phone: (203) 785-6938

21     Fax: (203) 785-3024

22     Email: [kevin.kim@yale.edu](mailto:kevin.kim@yale.edu)

23

24

## 25 **Summary**

26 Direct-acting antiviral use is associated with increased survival in hepatitis C-related  
27 hepatocellular carcinoma patients. Patients treated with direct-acting antiviral who achieved  
28 hepatitis C cure had additionally increased survival versus those treated with direct-acting  
29 antiviral who did not achieve hepatitis C cure. This study supports the use of direct-acting  
30 antiviral for hepatitis C treatment in hepatocellular carcinoma patients.

31

32 **Disclosures:** No authors have competing interests. The authors certify that they have no  
33 affiliations with or involvement in any organization or entity with any financial interest in the  
34 subject matter or materials discussed in this manuscript. Hyun S. Kim served on Advisory  
35 boards for Boston Scientific and SIRTex.

36

## 37 **Author Contributions:**

38 William Kamp - Data collection and analysis, writing of article, editing of article, final approval  
39 of article

40 Cortlandt Sellers –Data collection and analysis, writing of article, editing of article, final approval  
41 of article

42 Stacey Stein – Writing of article, editing of article, final approval of article

43 Joseph Lim – Writing of article, editing of article, final approval of article

44 Hyun Kim – Concept and design, supervision, funding, data analysis, writing of article, editing  
45 of article, final approval of article

46

## 47 **Grant Support**

48 WMK is supported by the Society of Interventional Radiology Foundation. HSK is supported by  
49 the United States Department of Defense (CA160741). The funders had no role in study design,  
50 data collection and analysis, decision to publish, or preparation of the manuscript.

51

52 **Abbreviations**

53 DAA: Direct-acting antivirals; SVR12: 12-week sustained virologic response; HCC:

54 hepatocellular carcinoma; HCV: hepatitis c virus; OS: median overall survival; AJCC: American

55 Joint Committee on Cancer stage; MELD: Model for end stage liver disease; HR: hazard ratio

56 **Abstract:**

57 **Background:** To investigate the impact of direct-acting antivirals (DAA) and 12-week sustained  
58 viral response (SVR12) in patients with hepatocellular carcinoma (HCC) and chronic hepatitis C  
59 virus (HCV) infection. **Methods:** Retrospective analysis of HCC patients diagnosed from 2005  
60 to 2016 at an urban tertiary-care hospital. Kaplan-Meier curves and multivariable Cox  
61 proportional hazards models were used to assess survival. **Results:** 969 patients met inclusion  
62 criteria. 478 patients received interventional oncology treatment (catheter-based therapies,  
63 ablation or combination locoregional therapies), 141 received supportive care (palliative or no  
64 treatment), 125 underwent liver transplantation, 112 had tumor resection and 94 received  
65 chemotherapy or radiation as their primary treatment. Median overall survival of the cohort was  
66 24.2 months (95% CI: 20.9-27.9). 470 patients had HCV (56%). 123 patients received DAA  
67 therapies for HCV (26.2%), 83 of whom achieved SVR12 (68%). HCV-positive and HCV-  
68 negative patients had similar survival (20.7 months vs 17.4 months,  $p=0.22$ ). Patients receiving  
69 DAA therapy had an overall survival of 71.8 months (CI: 39.5-not reached) vs 11.6 months (CI:  
70 9.8-14.5) for patients without DAA therapy ( $p<0.0001$ ). DAA patients who achieved SVR12 had  
71 an overall survival of 75.6 months (CI: 49.2-not reached) vs the non-SVR12 group (26.7 months,  
72 CI: 13.7-31.1,  $p<0.0001$ ). Multivariable analysis revealed AJCC, Child-Pugh Score, MELD,  
73 tumor size, tumor location and treatment type had independent influence on survival ( $p<0.05$ ).  
74 In HCV-positive patients, AJCC, MELD, tumor location, treatment allocation and DAA were  
75 significant ( $p<0.05$ ). In patients receiving DAA therapy, only MELD and SVR12 were predictive  
76 of overall survival ( $p<0.05$ ). **Conclusions:** DAA therapy and achieving SVR12 is associated  
77 with increased overall survival in HCV patients with HCC.

78

## 79 **Introduction**

80 Hepatocellular carcinoma (HCC) represents a global public health burden, affecting an  
81 estimated 14 million persons worldwide, and is the third leading cause of cancer mortality.<sup>1</sup>  
82 Within the United States, HCC is ranked 7<sup>th</sup> for cancer related mortality and has seen a doubling  
83 in incidence from 1975 to 2007.<sup>1,2,3,4</sup> The primary predisposing factors for HCC carcinogenesis is  
84 liver cirrhosis.<sup>1</sup> Cirrhosis risk factors include chronic alcohol use, viral hepatitis, including  
85 Hepatitis C (HCV), and non-alcoholic fatty liver disease.<sup>1</sup>

86 Chronic HCV infection is the second most common risk factor for HCC and is  
87 responsible for 10-25% of all HCC cases.<sup>1</sup> Over 20-30 years, 20-30% of patients with chronic  
88 HCV infections will develop cirrhosis and end stage liver disease and 1-4% of these patients will  
89 progress to HCC each year.<sup>5,6</sup> Of all HCV related HCC cases, 80-90% occur in the setting of  
90 cirrhosis.<sup>2</sup> With more than 3.5 million patients in the United States and an estimated 130-170  
91 million patients worldwide currently infected with HCV, the importance of HCV management in  
92 HCC therapeutic care and prevention is clear.<sup>7,8</sup> The major current therapeutic goal for HCV and  
93 prevention of liver disease progression is sustained viral response (SVR), which is defined by  
94 negative HCV RNA at 12 weeks post-treatment (SVR12) and appears to be durable with a late  
95 virologic relapse rate of less than 1%.<sup>9,10</sup>

96 Therapeutic management of HCV has recently undergone a shifted from interferon-based  
97 therapies to all-oral interferon-free direct-acting antiviral (DAA) combination regimens. DAAs  
98 are a new class of drugs that target nonstructural proteins responsible for replication and  
99 infection of the hepatitis c virus.<sup>10,11,12</sup> Genotype specific DAA therapies have been shown to  
100 reach SVR12 exceeding 90% of patients with fewer adverse effects compared with historic  
101 interferon-based regimens.<sup>7,13,14,15,16,17,18</sup> SVR12 from DAA regimens have been associated with

102 a decrease in liver outcomes including cirrhosis, hepatic decompensation, HCC and mortality.<sup>19</sup>  
103 However, the impact of DAA regimens on clinical outcomes in patients with HCC remain  
104 limited. This study evaluates the impact of DAA on overall survival in HCV patients with HCC  
105 with the *a priori* hypothesis that SVR12 would be associated with improved outcome.

106

## 107 **Materials and Methods**

### 108 Study Cohort

109 Patient data were collected from those with prior consent to research participation and  
110 institutional review board approval. Patients met criteria if they had a radiologic or  
111 histopathologic HCC diagnosis defined by NCI/AASLD guidelines at Yale New Haven Hospital  
112 between 2005 to 2016. Patients were grouped by primary HCC treatment including liver  
113 transplantation, tumor resection, interventional oncological procedures (catheter-based therapies,  
114 ablation or combination locoregional therapy), systemic management (chemotherapy or  
115 radiation) and supportive care (palliative or no treatment). All patients were reviewed for history  
116 of HCV infection diagnosis based on positive HCV antibody, positive HCV RNA and/or ICD-9  
117 recorded in electronic medical records. Only those with a HCV infection diagnosis were assessed  
118 for DAA treatment. Coinfections such as hepatitis B (HBV) and/or human immunodeficiency  
119 virus (HIV) or prior HCV treatment with therapies other than DAA and/or use of multiple DAAs  
120 did not preclude patients from analysis. SVR12 status was only collected for patients with HCV  
121 plus any reported DAA use for HCV. Patients that reached SVR12 on interferon-based regimens  
122 were not included with patients reaching SVR12 via DAA regimens. Exclusion criteria for this  
123 study included unknown survival status and histopathologic diagnosis of combined HCC and  
124 cholangiocarcinoma. Liver transplant patients were excluded from HCC, DAA and SVR12

125 overall survival and multivariable hazard ratio analyses. Patients were conservatively excluded in  
126 analyses for which they had unknown values. The primary outcome of interest was overall  
127 survival (OS), defined as time from HCC diagnosis to all-cause mortality or censoring.

128

## 129 Statistical Analysis

130 Kaplan-Meier curves and Cox proportional hazards models were used to assess survival.  
131 Univariate analysis of age, sex, Child-Pugh Score, tumor size, model for end-stage liver disease  
132 (MELD), AJCC stage, body mass index, alpha-fetoprotein level, platelet count, unilobar or  
133 bilobar tumor presentation, presence of multiple tumors, main treatment, HCV infection, DAA  
134 treatment and SVR12 status were performed and variables with a p-value <0.2 were included  
135 into multivariable analysis. Statistical analyses performed with JMP Pro 13.1.0 (SAS Institute,  
136 Cary, North Carolina) and GraphPad Prism 8.0.0 (GraphPad Software, La Jolla, California).  
137 Values were considered statistically significant with a p-value of less than 0.05.

138

## 139 Results

### 140 Cohort Description

141 Between 2005 and 2016, 969 HCC patients met inclusion criteria (Table 1). Mean age of  
142 cohort at HCC diagnosis was 62.8±10.2 years. The group was predominately male at 79%. As  
143 shown in Figure 1A, 478 patients (49.3%) received interventional oncology therapies, 141  
144 (14.6%) received supportive care, 125 (12.9%) underwent liver transplantation, 112 (11.6%) had  
145 tumor resection and 94 (9.7%) received chemotherapy and/or radiation as their primary  
146 treatment. Among non-transplant patients, 470 (57.0%) patients were HCV positive of which  
147 123 (26.2%) received a DAA regimen. Of those patients receiving DAAs for HCV treatment 83

148 (67.4%) achieved SVR12 (Figure 1B). Median OS for all patients was 24.2 months (95%  
149 CI:20.9-27.9) (Figure 2A). Median OS for patients receiving liver transplantation (n=125) was  
150 not reached as more than 50% of subgroup were alive at time of last follow up. Patients  
151 undergoing tumor resection (n=112) had a median OS=56.7 months (95% CI: 41.9-103.5),  
152 interventional oncology (IO) (n=478) median OS=27.7 (95% CI:22.3-30.7), systemic therapy  
153 (n=94) median OS=5.6 months (95% CI: 4.4-7.3) and supportive management (n=141) median  
154 OS=2.4 months (95% CI: 1.9-3.2, overall  $p<0.0001$ , figure 2B).

155

156 **Fig. 1: A)** Treatment allocation of the entire hepatocellular carcinoma cohort **B)** Patients  
157 stratified by HCV infection, DAA therapy, and achievement of SVR12

158 **Fig. 2: A)** Survival rate for all hepatocellular carcinoma (HCC) patients within cohort (n=969) in  
159 months since HCC diagnosis. **B)** OS for HCC patients by main HCC treatment method. Patients  
160 receiving liver transplantation (n=125). Patients undergoing tumor resection (n=112),  
161 interventional oncology (IO) (n=478), systemic therapy (n=94) and supportive management  
162 (n=141) (overall  $p<0.0001$ ).

163

164

165

166

167

168

169

170



171 **Table 1: Cohort and Subgroup Characteristics**

|                                           | Cohort      | HCV Patients | Non-DAA Patients | DAA Patients | Non-SVR12 Patients | SVR12 Patients |
|-------------------------------------------|-------------|--------------|------------------|--------------|--------------------|----------------|
| Age at HCC Diagnosis (years) (mean±stdev) | 62.8±10.2   | 60.5±7.7     | 59.9±7.7         | 61.7±5.8     | 61.6±5.3           | 61.8±6.1       |
| Sex                                       |             |              |                  |              |                    |                |
| Male                                      | 768 (79.3%) | 390 (83.0%)  | 202 (82.4%)      | 99 (80.5%)   | 28 (90.3%)         | 63 (75.9%)     |
| Female                                    | 201 (20.7%) | 80 (17.0%)   | 43 (17.6%)       | 24 (19.5%)   | 3 (9.7%)           | 20 (24.1%)     |
| Liver Factors                             |             |              |                  |              |                    |                |
| AJCC                                      |             |              |                  |              |                    |                |
| 1                                         | 400 (43.8%) | 198 (44.5%)  | 79 (34.5%)       | 79 (65.3%)   | 15 (48.4%)         | 58 (71.6%)     |
| 2                                         | 244 (26.7%) | 110 (24.7%)  | 63 (27.5%)       | 31 (25.6%)   | 11 (35.5%)         | 19 (23.5%)     |
| 3                                         | 162 (17.7%) | 86 (19.3%)   | 53 (23.1%)       | 8 (6.6%)     | 3 (9.7%)           | 4 (4.9%)       |
| 4                                         | 107 (11.7%) | 51 (11.5%)   | 34 (14.8%)       | 3 (2.5%)     | 2 (6.5%)           | 0              |
| Child Pugh Score                          |             |              |                  |              |                    |                |
| A                                         | 512 (55.2%) | 254 (56.3%)  | 116 (49.2%)      | 84 (68.9%)   | 24 (77.4%)         | 54 (65.9%)     |
| B                                         | 284 (30.6%) | 132 (29.3%)  | 80 (33.9%)       | 30 (24.6%)   | 6 (19.4%)          | 21 (25.6%)     |
| C                                         | 132 (14.2%) | 65 (14.4%)   | 40 (16.9%)       | 8 (6.6%)     | 1 (3.2%)           | 7 (8.5%)       |
| MELD (mean±stdev)                         | 11.4±5.7    | 10.7±4.6     | 11.4±5.2         | 9.5±3.4      | 9.3±3.1            | 9.67±3.5       |
| Tumor Size (cm) (mean±stdev)              | 4.48±3.6    | 4.18±3.3     | 4.70±3.6         | 2.76±1.7     | 3.09±2.4           | 2.57±1.3       |
| Tumor Location                            |             |              |                  |              |                    |                |
| Unilobar                                  | 628 (66.7%) | 298 (65.1%)  | 137 (57.6%)      | 93 (75.6%)   | 17 (54.8%)         | 68 (81.9%)     |
| Bilobar                                   | 314 (33.3%) | 160 (34.9%)  | 101 (42.4%)      | 30 (24.4%)   | 14 (45.2%)         | 15 (18.1%)     |
| Multiple Tumors                           |             |              |                  |              |                    |                |
| yes                                       | 442 (45.9%) | 225 (48.4%)  | 133 (55.0%)      | 47 (38.2%)   | 19 (61.3%)         | 27 (32.5%)     |
| no                                        | 520 (54.1%) | 240 (51.6%)  | 109 (45.0%)      | 76 (61.8%)   | 12 (38.7%)         | 56 (67.5%)     |
| Main Treatment                            |             |              |                  |              |                    |                |
| Transplant                                | 125 (13.2%) | 0            | 0                | 0            | 0                  | 0              |
| Resection                                 | 112 (11.8%) | 56 (12.1%)   | 21 (8.6%)        | 21 (17.4%)   | 5 (16.1%)          | 16 (19.5%)     |
| IO                                        | 478 (50.3%) | 285 (61.6%)  | 143 (58.4%)      | 93 (76.9%)   | 24 (77.4%)         | 63 (76.8%)     |
| Systemic                                  | 94 (9.9%)   | 45 (9.7%)    | 26 (10.6%)       | 4 (3.3%)     | 1 (3.2%)           | 1 (1.2%)       |
| Supportive                                | 141 (14.8%) | 77 (16.6%)   | 55 (22.4%)       | 3 (2.5%)     | 1 (3.2%)           | 2 (2.4%)       |
| Hepatitis C Factors                       |             |              |                  |              |                    |                |
| HCV Infection                             | 551 (56.9%) | 470          | 245              | 123          | 31                 | 83             |
| DAA Treatment                             |             | 123 (26.2%)  | 0                | 123          | 31                 | 83             |
| SVR12                                     |             |              |                  | 83 (67.5%)   | 0                  | 83             |

172

173 **Table 1:** Characteristics of cohort, HCV, non-DAA, DAA, non-SVR12 and SVR12 subgroups, n

174 (%) or mean ± standard deviation as marked. AJCC: American Joint Committee on Cancer stage,

175 MELD: model for end stage liver disease, IO: interventional oncology, HCV: hepatitis C, DAA:  
176 direct-acting antivirals, SVR12: sustained viral response at 12 weeks.

177

### 178 Overall Survival in HCV and DAA Subgroups

179 Subgroup analysis of HCV patients, recipients of DAA and those that achieved SVR12  
180 revealed significant influences on OS. Although patients with and without HCV showed no  
181 significant difference in survival: median OS 20.7 months (95% CI: 16.5-24.1) versus 17.4  
182 months (95% CI: 13.0-20.6) respectively, ( $p=0.22$ ), HCV patients that received DAA had a  
183 median OS of 71.8 months (95% CI: 39.5-not reached) compared to 11.6 months (95% CI: 9.8-  
184 14.5) for HCV patients that did not use DAAs ( $p<0.0001$ )(Figure 3). Patients achieving SVR12  
185 had a higher median OS of 75.6 months (95% CI: 49.2-not reached) versus 26.7 months (95%  
186 CI: 13.7-31.1) for patients with positive HCV RNA by PCR 12 weeks post-DAA cessation  
187 (Figure 3C) ( $p<0.0001$ ).

188

### 189 **Fig. 3: Patient survival rate in months since hepatocellular carcinoma (HCC) diagnosis. A)**

190 HCC Patients with positive history of hepatitis c (HCV) infection (n=470) versus patients with  
191 no history of HCV (n=363) ( $p=0.22$ ) **B)** HCC and HCV patients that received a direct-acting  
192 antiviral (DAA) (n=123) versus those who did not receive a DAA (n=247) ( $p<0.0001$ ) **C)**  
193 Patients with HCC and HCV that received a DAA and achieved sustained viral response  
194 (SVR12) (n=83) versus those who did not achieve SVR12 (n=31) ( $p<0.0001$ ).

195

### 196 Prognostic Factors

197           Multivariable analyses of subgroups were performed to assess impact of relevant HCC  
198 prognostic markers, HCC therapies, HCV factors and lab values. Within all non-transplant  
199 patients, numerous factors significantly influenced overall survival (Figure 4A, Table 2). AJCC  
200 stage 4 had decreased survival compared to stage 1 (HR=2.77, 95% CI:1.86-4.08, p<0.0001) and  
201 2 (HR=2.06, 95% CI: 1.40-3.01, p=0.0003). AJCC stage 3 also had poorer survival as compared  
202 to stage 1 (HR=2.29, 95% CI: 1.26-2.30, p<0.0001) and 2 (HR=1.70, 95% CI: 1.26-2.30,  
203 p=0.0005). AJCC stage 2 had a HR=1.34 (95% CI: 1.03-1.75, p=0.03) compared to stage 1.  
204 Increased Child-Pugh score was also associated with worsened survival (Child Pugh C vs. A: HR  
205 1.69, 95% CI: 1.07-2.65, p=0.02; B vs A: HR 1.83, 95% CI: 1.43-2.233, p<0.0001), as were  
206 increased MELD score, increased tumor size, and bilobar tumors (p<0.05). Treatment allocation  
207 significantly impacted survival, with resection demonstrating improved survival vs interventional  
208 oncology (HR=0.56, 95% CI: 0.39-0.81, p=0.002), systemic therapies (HR=0.26, 95% CI:0.16-  
209 0.42, p<0.0001) and supportive management (HR=0.12, 95% CI:0.08-0.19, p<0.0001).  
210 Interventional oncology increased survival rates over systemic therapies (HR=0.46, 95%  
211 CI:0.33-0.65, p<0.0001) and supportive management (HR=0.22, 95% CI:0.16-0.29, p<0.0001).  
212 Systemic therapies showed improved survival rates over supportive therapies (HR=0.47, 95%  
213 CI:0.42-0.68, p<0.0001).

214

215

216

217

218

219

220 **Table 2: Hazard Ratios for Cohort and HCV and DAA subgroups**

|                          | Total                                | HCV                                  | DAA                                  |
|--------------------------|--------------------------------------|--------------------------------------|--------------------------------------|
| Sex - Male/Female        | 1.25 (0.99-1.49, p=0.0592)           | 1.28 (0.89-1.89, p=0.1924)           | 1.30 (0.39-5.25, p=0.6799)           |
| Liver Factors            |                                      |                                      |                                      |
| MELD                     | <b>1.03 (1.00-1.06, p=0.0168)</b>    | <b>1.05 (1.00-1.11, p=0.0468)</b>    | 1.21 (1.02-1.44, p=0.0326)           |
| Tumor Size               | <b>1.06 (1.02-1.09, p&lt;0.0007)</b> | 1.01 (0.95-1.06, p=0.08082)          | 0.75 (0.49-1.06, p=0.1044)           |
| Bilobar/Unilobar         | <b>1.32 (1.03-1.69, p=0.026)</b>     | <b>1.62 (1.14-2.30, p=0.0072)</b>    | 1.38 (0.36-5.51, p=0.6354)           |
| Multiple Tumors - yes/no | 1.03 (0.80-1.32, p=0.816)            | 1.27 (0.88-1.83, p=0.1986)           | 1.01 (0.41-2.99, p=0.9831)           |
| AJCC                     |                                      |                                      |                                      |
| 4/1                      | <b>2.77 (1.86-4.08, p&lt;0.0001)</b> | 1.59 (0.79-3.09, p=0.19)             |                                      |
| 4/2                      | <b>2.06 (1.40-3.01, p=0.0003)</b>    | 1.32 (0.67-2.53, p=0.4209)           |                                      |
| 4/3                      | 1.21 (0.86-1.68, p=0.2704)           | 0.75 (0.42-1.31, p=0.3186)           |                                      |
| 3/1                      | <b>2.29 (1.69-3.09, p&lt;0.0001)</b> | <b>2.11 (1.25-5.54, p&lt;0.0051)</b> | 1.81 (0.08-13.48, p=0.6350)          |
| 3/2                      | <b>1.70 (1.26-2.30, p=0.0005)</b>    | <b>1.76 (1.05-2.92, p=0.0328)</b>    | 2.28 (0.10-19.85, p=0.5336)          |
| 2/1                      | <b>1.34 (1.03-1.75, p=0.0305)</b>    | 1.20 (0.79-1.82, p=0.3872)           | 0.80 (0.27-2.22, p=0.6658)           |
| Child-Pugh Score         |                                      |                                      |                                      |
| C/A                      | <b>1.69 (1.07-2.65, p=0.0235)</b>    | 0.86 (0.42-1.73, p=0.6775)           | 0.13 (0.01-1.55, p=0.1068)           |
| C/B                      | 0.93 (0.63-1.35, p=0.6904)           | 0.65 (0.36-1.18, p=0.1549)           | 0.15 (0.01-1.67, p=0.1234)           |
| B/A                      | <b>1.83 (1.43-2.33, p&lt;0.0001)</b> | 1.33 (0.92-1.91, p=0.1351)           | 0.85 (0.30-2.40, p=0.7584)           |
| Main Treatment           |                                      |                                      |                                      |
| Resection/IO             | <b>0.56 (0.39-0.81, p=0.0019)</b>    | 0.79 (0.42-1.36, p=0.4118)           | 0.39 (0.05-1.92, p=0.2649)           |
| Resection/Systemic       | <b>0.26 (0.16-0.42, p&lt;0.0001)</b> | <b>0.29 (0.13-0.64, p=0.002)</b>     |                                      |
| Resection/Supportive     | <b>0.12 (0.08-0.19, p&lt;0.0001)</b> | <b>0.12 (0.06-0.25, p&lt;0.0001)</b> | 0.12 (0.00-5.53, p=0.2586)           |
| IO/Systemic              | <b>0.46 (0.33-0.65, p&lt;0.0001)</b> | <b>0.37 (0.21-0.68, p=0.0017)</b>    |                                      |
| IO/Supportive            | <b>0.22 (0.16-0.29, p&lt;0.0001)</b> | <b>0.16 (0.10-0.26, p&lt;0.0001)</b> | 0.31 (0.01-9.82, p=0.4652)           |
| Systemic/Supportive      | <b>0.47 (0.32-0.68, p&lt;0.0001)</b> | <b>2.34 (1.23-4.52, p=0.0093)</b>    |                                      |
| Hepatits C Factors       |                                      |                                      |                                      |
| HCV Infection - yes/no   | 0.85 (0.70-1.04, p=0.1151)           |                                      |                                      |
| DAA Therapy - yes/no     |                                      | <b>0.39 (0.26-0.58, p&lt;0.0001)</b> |                                      |
| SVR12 Attained - yes/no  |                                      |                                      | <b>0.14 (0.06-0.35, p&lt;0.0001)</b> |

221

222 **Table 2:** Hazard ratios from multivariable analysis. HR, 95% Confidence Interval, p-value,

223 AJCC: American Joint Committee on Cancer stage, MELD: model for end stage liver disease,

224 IO: interventional oncology, HCV: hepatitis C, DAA: direct-acting antivirals, SVR12: sustained

225 viral response at 12 weeks.

226

227

228           Multivariable analysis of non-transplant HCV patients showed similar results to non-  
229 transplant patients (Figure 4B) with the addition of DAA use as a significant prognostic marker  
230 (HR=0.39, 95% CI:0.26-0.58,  $p<0.0001$ ). In the final subgroup, including only DAA patients,  
231 only two factors were significant, MELD (HR=1.21, 95% CI:1.02-1.44,  $p=0.03$ ) and SVR12  
232 (HR=0.14, 95% CI:0.06-0.35,  $p<0.0001$ ).

233

234 **Fig. 4: Hazard ratios from multivariable analysis on overall survival in non-transplant**

235 **HCC patients.** Values greater than one indicate increased risk of death. Values less than one

236 indicate reduced risk of death. **A)** Hazard ratios in all non-transplant HCC patients. **B)** Hazard

237 ratios in all non-transplant HCC with history of HCV. \*  $=p<0.05$ , AJCC: American Joint

238 Committee on Cancer stage, MELD: model for end stage liver disease, AFP: alpha-fetoprotein,

239 IO: interventional oncology, HCV: hepatitis C, DAA: direct-acting antivirals.

240

## 241 **Discussion**

242           With the increasing incidence and prevalence of HCC and the impact of HCV infection on  
243 development of cirrhosis and HCC tumor formation, the importance of understanding the effects  
244 of DAA in HCC patients is only becoming more vital. One-half of the HCC cases among the  
245 three-fold increase in HCC incidence between 1975 and 2007 in the US can be attributed to the  
246 aging chronic HCV population.<sup>2</sup> Although there are indications that DAAs may slow progression  
247 to HCC,<sup>20,21</sup> there remains a vast population of HCC patients that could potentially benefit from  
248 treatment of their chronic HCV infections.

249           It is likely that the improved median overall survival seen in our cohort among HCC

250 patients taking DAAs is a direct result of the high success rate of achieving SVR12. Although

251 more patients are needed to reduce the possible influence of DAA exclusion from patients with  
252 worse prognoses, the over three-fold difference in median overall survival between those that did  
253 and did not achieve SVR12 likely indicates profound longitudinal effects of HCV cure in HCC  
254 patients. Although our data indicates less severe HCC and liver disease in DAA and SVR12  
255 patients versus their subgroup counterparts, multivariable  
256 analysis supports reduced all-cause mortality in patients receiving DAAs and achieving SVR12.  
257 In addition, others have reported that achieving SVR12 is associated with improved liver  
258 function, Child-Pugh scores and reversal of liver decompensation symptoms which could also be  
259 factors in the improved survival.<sup>22,23</sup>

260 Reaching SVR12 is not an easy task in the HCC patient population. Only 69% of our  
261 population reached SVR12 with similar results in other retrospective analyses of DAA use in  
262 HCC patients<sup>24,25</sup> compared to reported values of over 90% in populations powered to DAA  
263 efficacy.<sup>18</sup> Part of this may be due to the difficulty of integrating HCV treatment into HCC care,  
264 as demonstrated by the low rate of HCC patients with HCV receiving DAA treatment in our  
265 cohort (<50%). While there is currently much discussion as to how aggressive clinicians should  
266 be about treating active HCV in HCC patients, no official guidelines currently exist.<sup>23,26</sup>  
267 Frequently, HCC management supersedes HCV treatment as many providers seek to triage HCV  
268 until after the cancer has been treated.<sup>23</sup> In addition, debate is ongoing as to whether or not DAA  
269 use increases HCC recurrence rates.<sup>18,20,27,28,29, 30</sup>

270 Interestingly, our results suggest that there is ample time for HCV intervention in newly  
271 diagnosed HCC patients. The DAA treatment course typically 8-24 weeks,<sup>31</sup> and patients  
272 receiving resection or IO treatments, 74% of our cohort population, had a median overall  
273 survival greater than 27 months. We are hopeful that conversion from non-DAA to DAA

274 medications and subsequent SVR12 achievement will increase as awareness and use of DAA in  
275 current HCV management increases.

276 This cohort also raises important questions for future research. The patients achieving SVR12  
277 with DAA include those that had previously failed interferon-based therapies and subsequently  
278 received DAA after their introduction, those that received multiple courses and combinations of  
279 DAA and those that received DAA for different lengths of time. Some received DAA during  
280 HCC management while others received DAA before their HCC diagnosis. More work is needed  
281 in areas concerning the differences in DAA regimen efficacy to understand the most appropriate  
282 combination of DAA and regimen length and then tailor these by HCV genotype, HCC  
283 prognosis and other host and genetic factors in order to help more patients achieve SVR12 and  
284 better overall outcomes.

285

## 286 **References**

- 287 1. Ghouri YA, Mian I, Rowe JH. Review of hepatocellular carcinoma: Epidemiology,  
288 etiology, and carcinogenesis. *J Carcinog.* 2017;16:1.
- 289 2. Mittal S, El-Serag HB. Epidemiology of hepatocellular carcinoma: consider the  
290 population. *J Clin Gastroenterol.* 2013;47 Suppl:S2-6.
- 291 3. Njei B, Rotman Y, Ditah I, Lim JK. Emerging trends in hepatocellular carcinoma  
292 incidence and mortality. *Hepatology.* 2015;61(1):191-9.
- 293 4. White DL, Thrift AP, Kanwal F, Davila J, El-Serag HB. Incidence of Hepatocellular  
294 Carcinoma in All 50 United States, From 2000 Through 2012. *Gastroenterology.*  
295 2017;152(4):812-20 e5.

- 296 5. Chen SL, Morgan TR. The natural history of hepatitis C virus (HCV) infection. *Int J Med*  
297 *Sci.* 2006;3(2):47-52.
- 298 6. Patel K, Muir AJ, McHutchison JG. Diagnosis and treatment of chronic hepatitis C  
299 infection. *BMJ.* 2006;332(7548):1013-7.
- 300 7. Scheel TK, Rice CM. Understanding the hepatitis C virus life cycle paves the way for  
301 highly effective therapies. *Nat Med.* 2013;19(7):837-49.
- 302 8. Edlin BR, Eckhardt BJ, Shu MA, Holmberg SD, Swan T. Toward a more accurate  
303 estimate of the prevalence of hepatitis C in the United States. *Hepatology.*  
304 2015;62(5):1353-63.
- 305 9. Pearlman BL, Traub N. Sustained virologic response to antiviral therapy for chronic  
306 hepatitis C virus infection: a cure and so much more. *Clin Infect Dis.* 2011;52(7):889-  
307 900.
- 308 10. Poordad F, Dieterich D. Treating hepatitis C: current standard of care and emerging  
309 direct-acting antiviral agents. *J Viral Hepat.* 2012;19(7):449-64.
- 310 11. Dubuisson J. Hepatitis C virus proteins. *World J Gastroenterol.* 2007;13(17):2406-15.
- 311 12. Moradpour D, Penin F, Rice CM. Replication of hepatitis C virus. *Nat Rev Microbiol.*  
312 2007;5(6):453-63.
- 313 13. Manns MP, McHutchison JG, Gordon SC, Rustgi VK, Shiffman M, Reindollar R, et al.  
314 Peginterferon alfa-2b plus ribavirin compared with interferon alfa-2b plus ribavirin for  
315 initial treatment of chronic hepatitis C: a randomised trial. *Lancet.* 2001;358(9286):958-  
316 65.



- 317 14. Fried MW, Shiffman ML, Reddy KR, Smith C, Marinos G, Goncales FL, Jr., et al.  
318 Peginterferon alfa-2a plus ribavirin for chronic hepatitis C virus infection. *N Engl J Med.*  
319 2002;347(13):975-82.
- 320 15. Manns MP, Wedemeyer H, Cornberg M. Treating viral hepatitis C: efficacy, side effects,  
321 and complications. *Gut.* 2006;55(9):1350-9.
- 322 16. Feuerstadt P, Bunim AL, Garcia H, Karlitz JJ, Massoumi H, Thosani AJ, et al.  
323 Effectiveness of hepatitis C treatment with pegylated interferon and ribavirin in urban  
324 minority patients. *Hepatology.* 2010;51(4):1137-43.
- 325 17. Welzel TM, Petersen J, Herzer K, Ferenci P, Gschwantler M, Wedemeyer H, et al.  
326 Daclatasvir plus sofosbuvir, with or without ribavirin, achieved high sustained virological  
327 response rates in patients with HCV infection and advanced liver disease in a real-world  
328 cohort. *Gut.* 2016;65(11):1861-70.
- 329 18. Ioannou GN, Feld JJ. What are the Benefits of a Sustained Virologic Response to Direct-  
330 acting Antiviral Therapy for HCV Infection? *Gastroenterology.* 2018.
- 331 19. Backus LI, Belperio PS, Shahoumian TA, Mole LA. Impact of sustained virologic  
332 response with direct-acting antiviral treatment on mortality in patients with advanced  
333 liver disease. *Hepatology.* 2017.
- 334 20. Ferrarese A, Germani G, Gambato M, Russo FP, Senzolo M, Zanetto A, et al. Hepatitis C  
335 virus related cirrhosis decreased as indication to liver transplantation since the  
336 introduction of direct-acting antivirals: A single-center study. *World J Gastroenterol.*  
337 2018;24(38):4403-11.
- 338 21. Vaziri A, Gimson A, Agarwal K, Aldersley M, Bathgate A, MacDonald D, et al. Liver  
339 transplant listing for hepatitis C associated cirrhosis and hepatocellular carcinoma has

- 340           fallen in the United Kingdom since the introduction of direct acting antiviral therapy. J  
341           Viral Hepat. 2018.
- 342           22. Pascasio JM, Vinaixa C, Ferrer MT, Colmenero J, Rubin A, Castells L, et al. Clinical  
343           outcomes of patients undergoing antiviral therapy while awaiting liver transplantation. J  
344           Hepatol. 2017;67(6):1168-76.
- 345           23. Cabibbo G, Celsa C, Camma C, Craxi A. Should we cure hepatitis C virus in patients  
346           with hepatocellular carcinoma while treating cancer? Liver Int. 2018.
- 347           24. Beste LA, Green PK, Berry K, Kogut MJ, Allison SK, Ioannou GN. Effectiveness of  
348           hepatitis C antiviral treatment in a USA cohort of veteran patients with hepatocellular  
349           carcinoma. J Hepatol. 2017;67(1):32-9.
- 350           25. Prenner SB, VanWagner LB, Flamm SL, Salem R, Lewandowski RJ, Kulik L.  
351           Hepatocellular carcinoma decreases the chance of successful hepatitis C virus therapy  
352           with direct-acting antivirals. J Hepatol. 2017;66(6):1173-81.
- 353           26. Yu JH, Kim JK, Lee KS, Lee JI. Antiviral Therapy in Patients With Chronic Hepatitis C-  
354           related Hepatocellular Carcinoma Responding to Palliative Treatment. J Clin  
355           Gastroenterol. 2018;52(6):557-62.
- 356           27. Nagata H, Nakagawa M, Asahina Y, Sato A, Asano Y, Tsunoda T, et al. Effect of  
357           interferon-based and -free therapy on early occurrence and recurrence of hepatocellular  
358           carcinoma in chronic hepatitis C. J Hepatol. 2017;67(5):933-9.
- 359           28. Gigi E, Lagopoulos VI, Bekiari E. Hepatocellular carcinoma occurrence in DAA-treated  
360           hepatitis C virus patients: Correlated or incidental? A brief review. World J Hepatol.  
361           2018;10(9):595-602.

- 362 29. Nishibatake Kinoshita M, Minami T, Tateishi R, Wake T, Nakagomi R, Fujiwara N, et al.  
363 Impact of direct-acting antivirals on early recurrence of HCV-related HCC: comparison  
364 with interferon-based therapy. *J Hepatol*. 2018.
- 365 30. Singal AG, Rich NE, Mehta N, Branch A, Pillai A, Hoteit M, et al. Direct-Acting  
366 Antiviral Therapy not Associated with Recurrence of Hepatocellular Carcinoma in a  
367 Multicenter North American Cohort Study. *Gastroenterology*. 2019.
- 368 31. Emmanuel B, Wilson EM, O'Brien TR, Kottlil S, Lau G. Shortening the duration of  
369 therapy for chronic hepatitis C infection. *Lancet Gastroenterol Hepatol*. 2017;2(11):832-  
370 6.

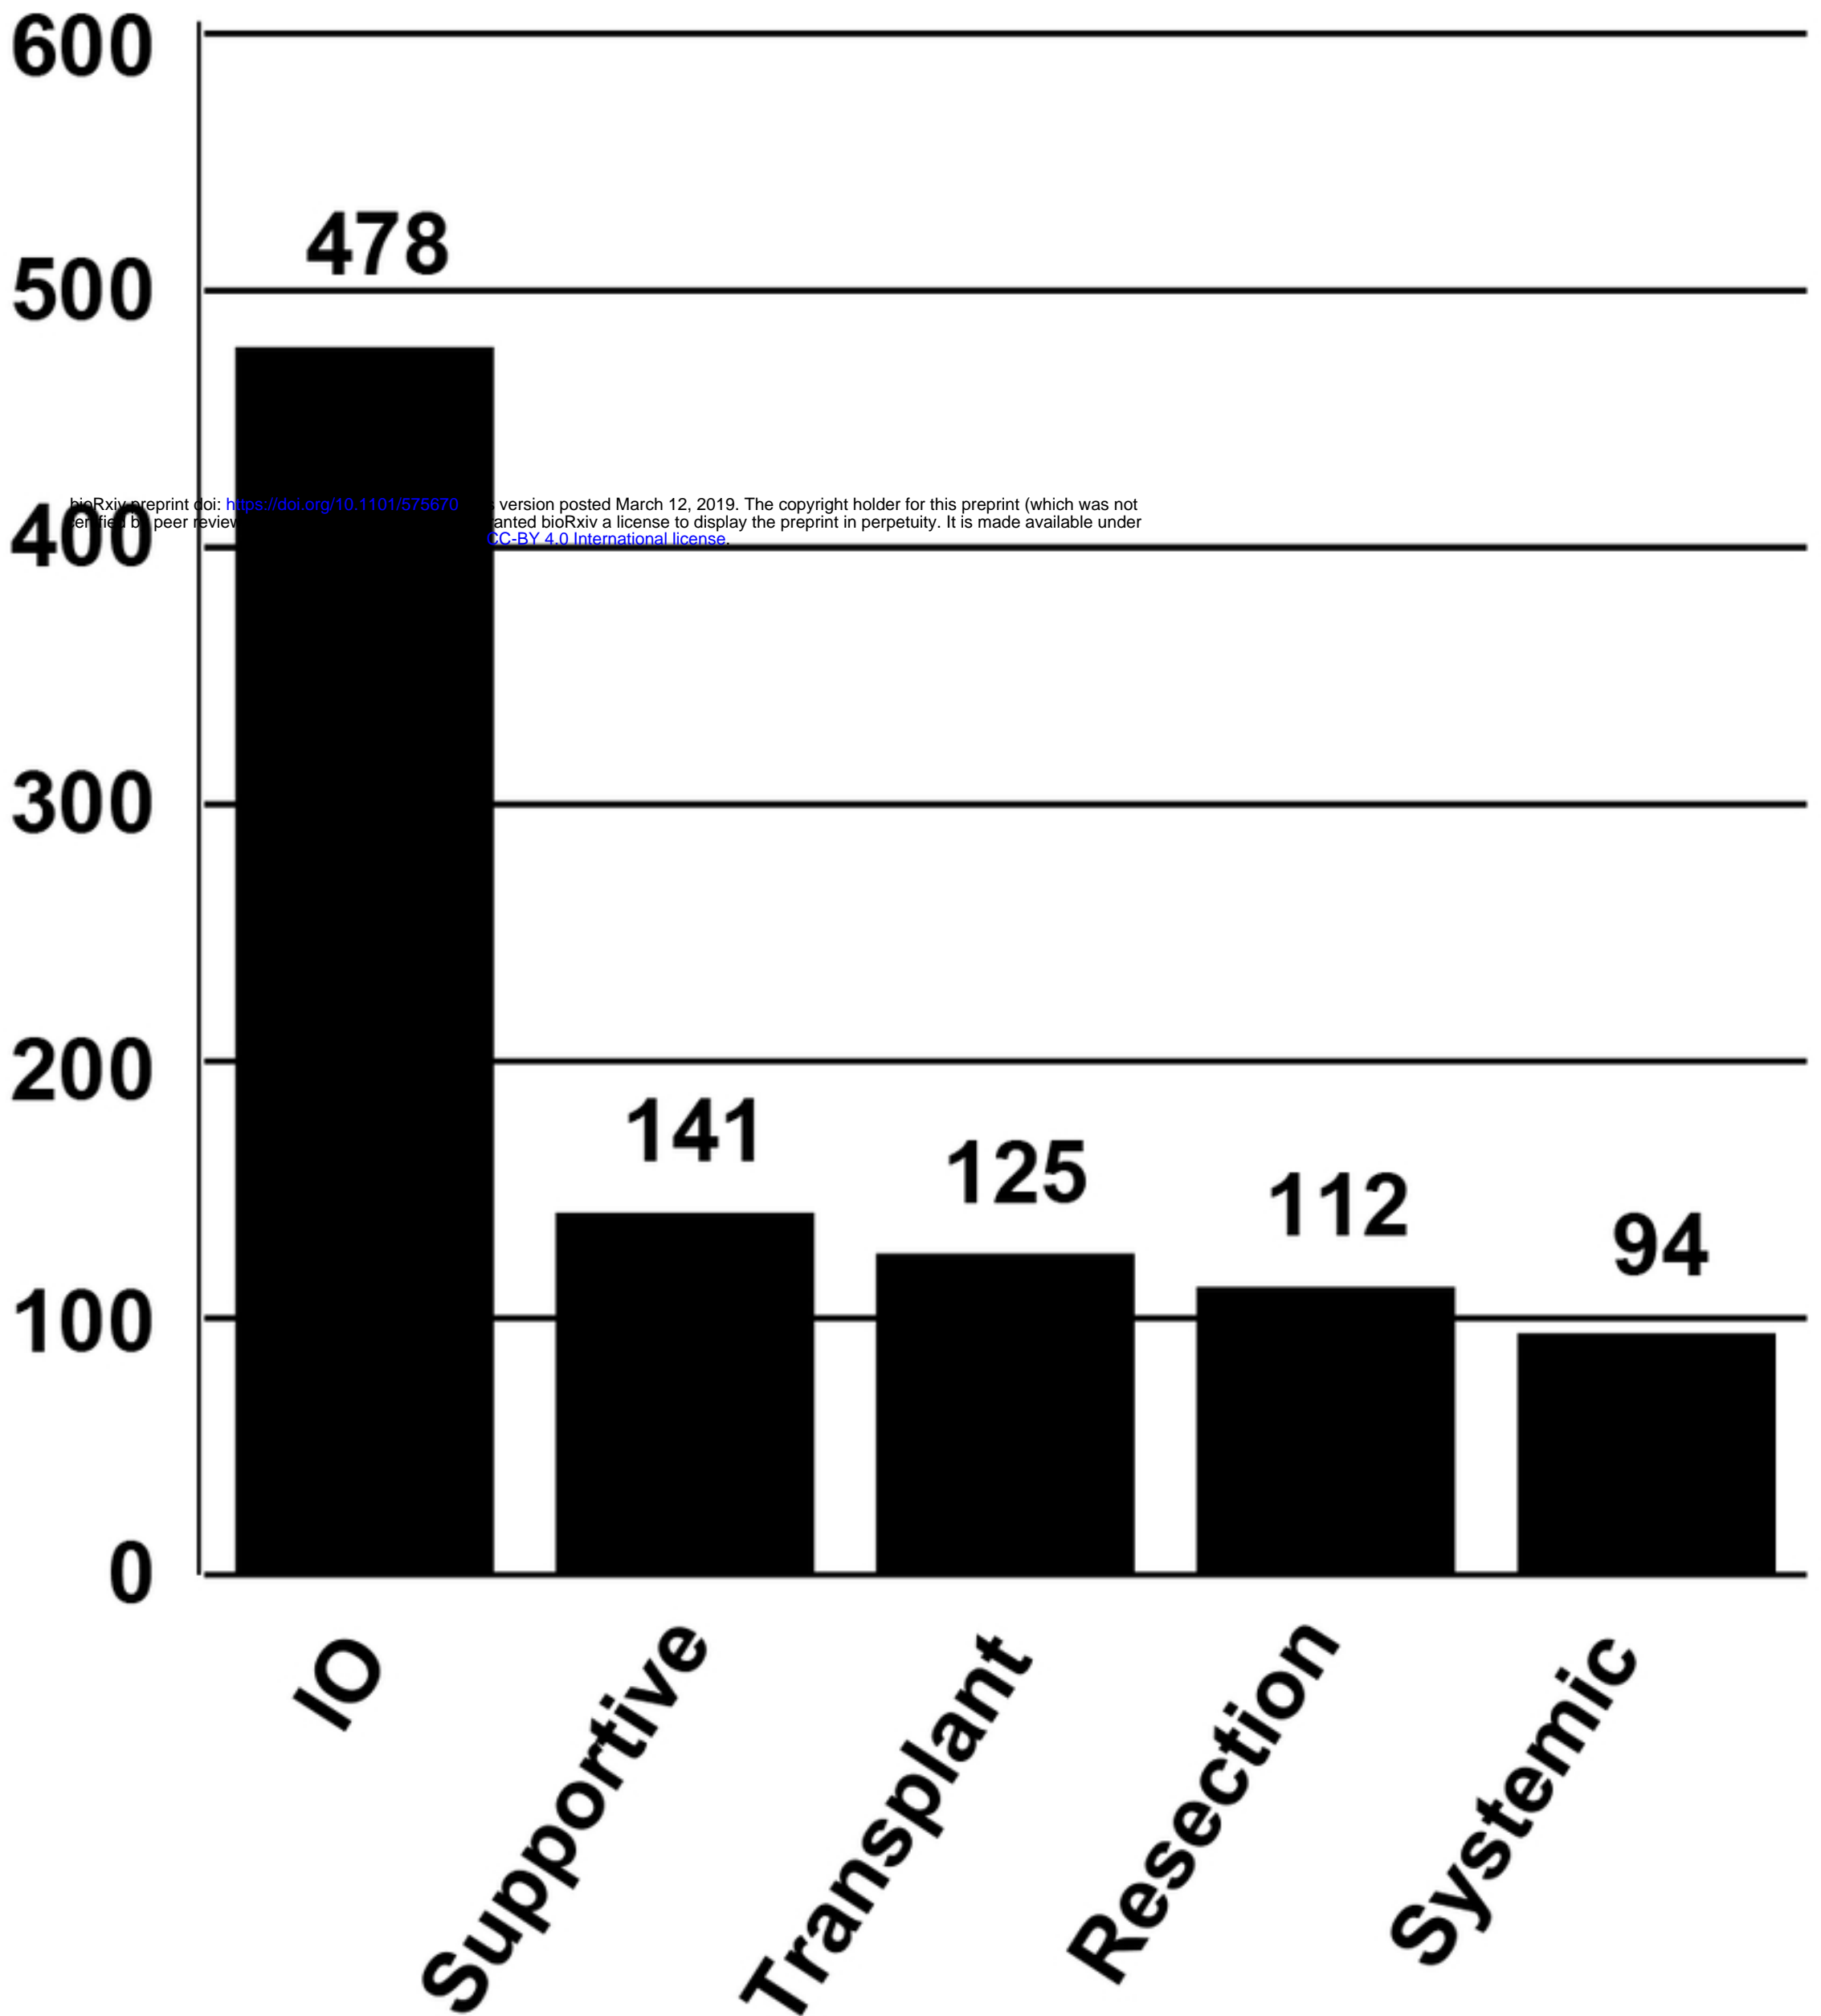

bioRxiv preprint doi: <https://doi.org/10.1101/575670>; this version posted March 12, 2019. The copyright holder for this preprint (which was not certified by peer review) is the author/funder, who has granted bioRxiv a license to display the preprint in perpetuity. It is made available under aCC-BY 4.0 International license.

Figure 1a

900

bioRxiv preprint doi: <https://doi.org/10.1101/575670>; this version posted March 12, 2019. The copyright holder for this preprint (which was not certified by peer review) is the author/funder, who has granted bioRxiv a license to display the preprint in perpetuity. It is made available under aCC-BY 4.0 International license.

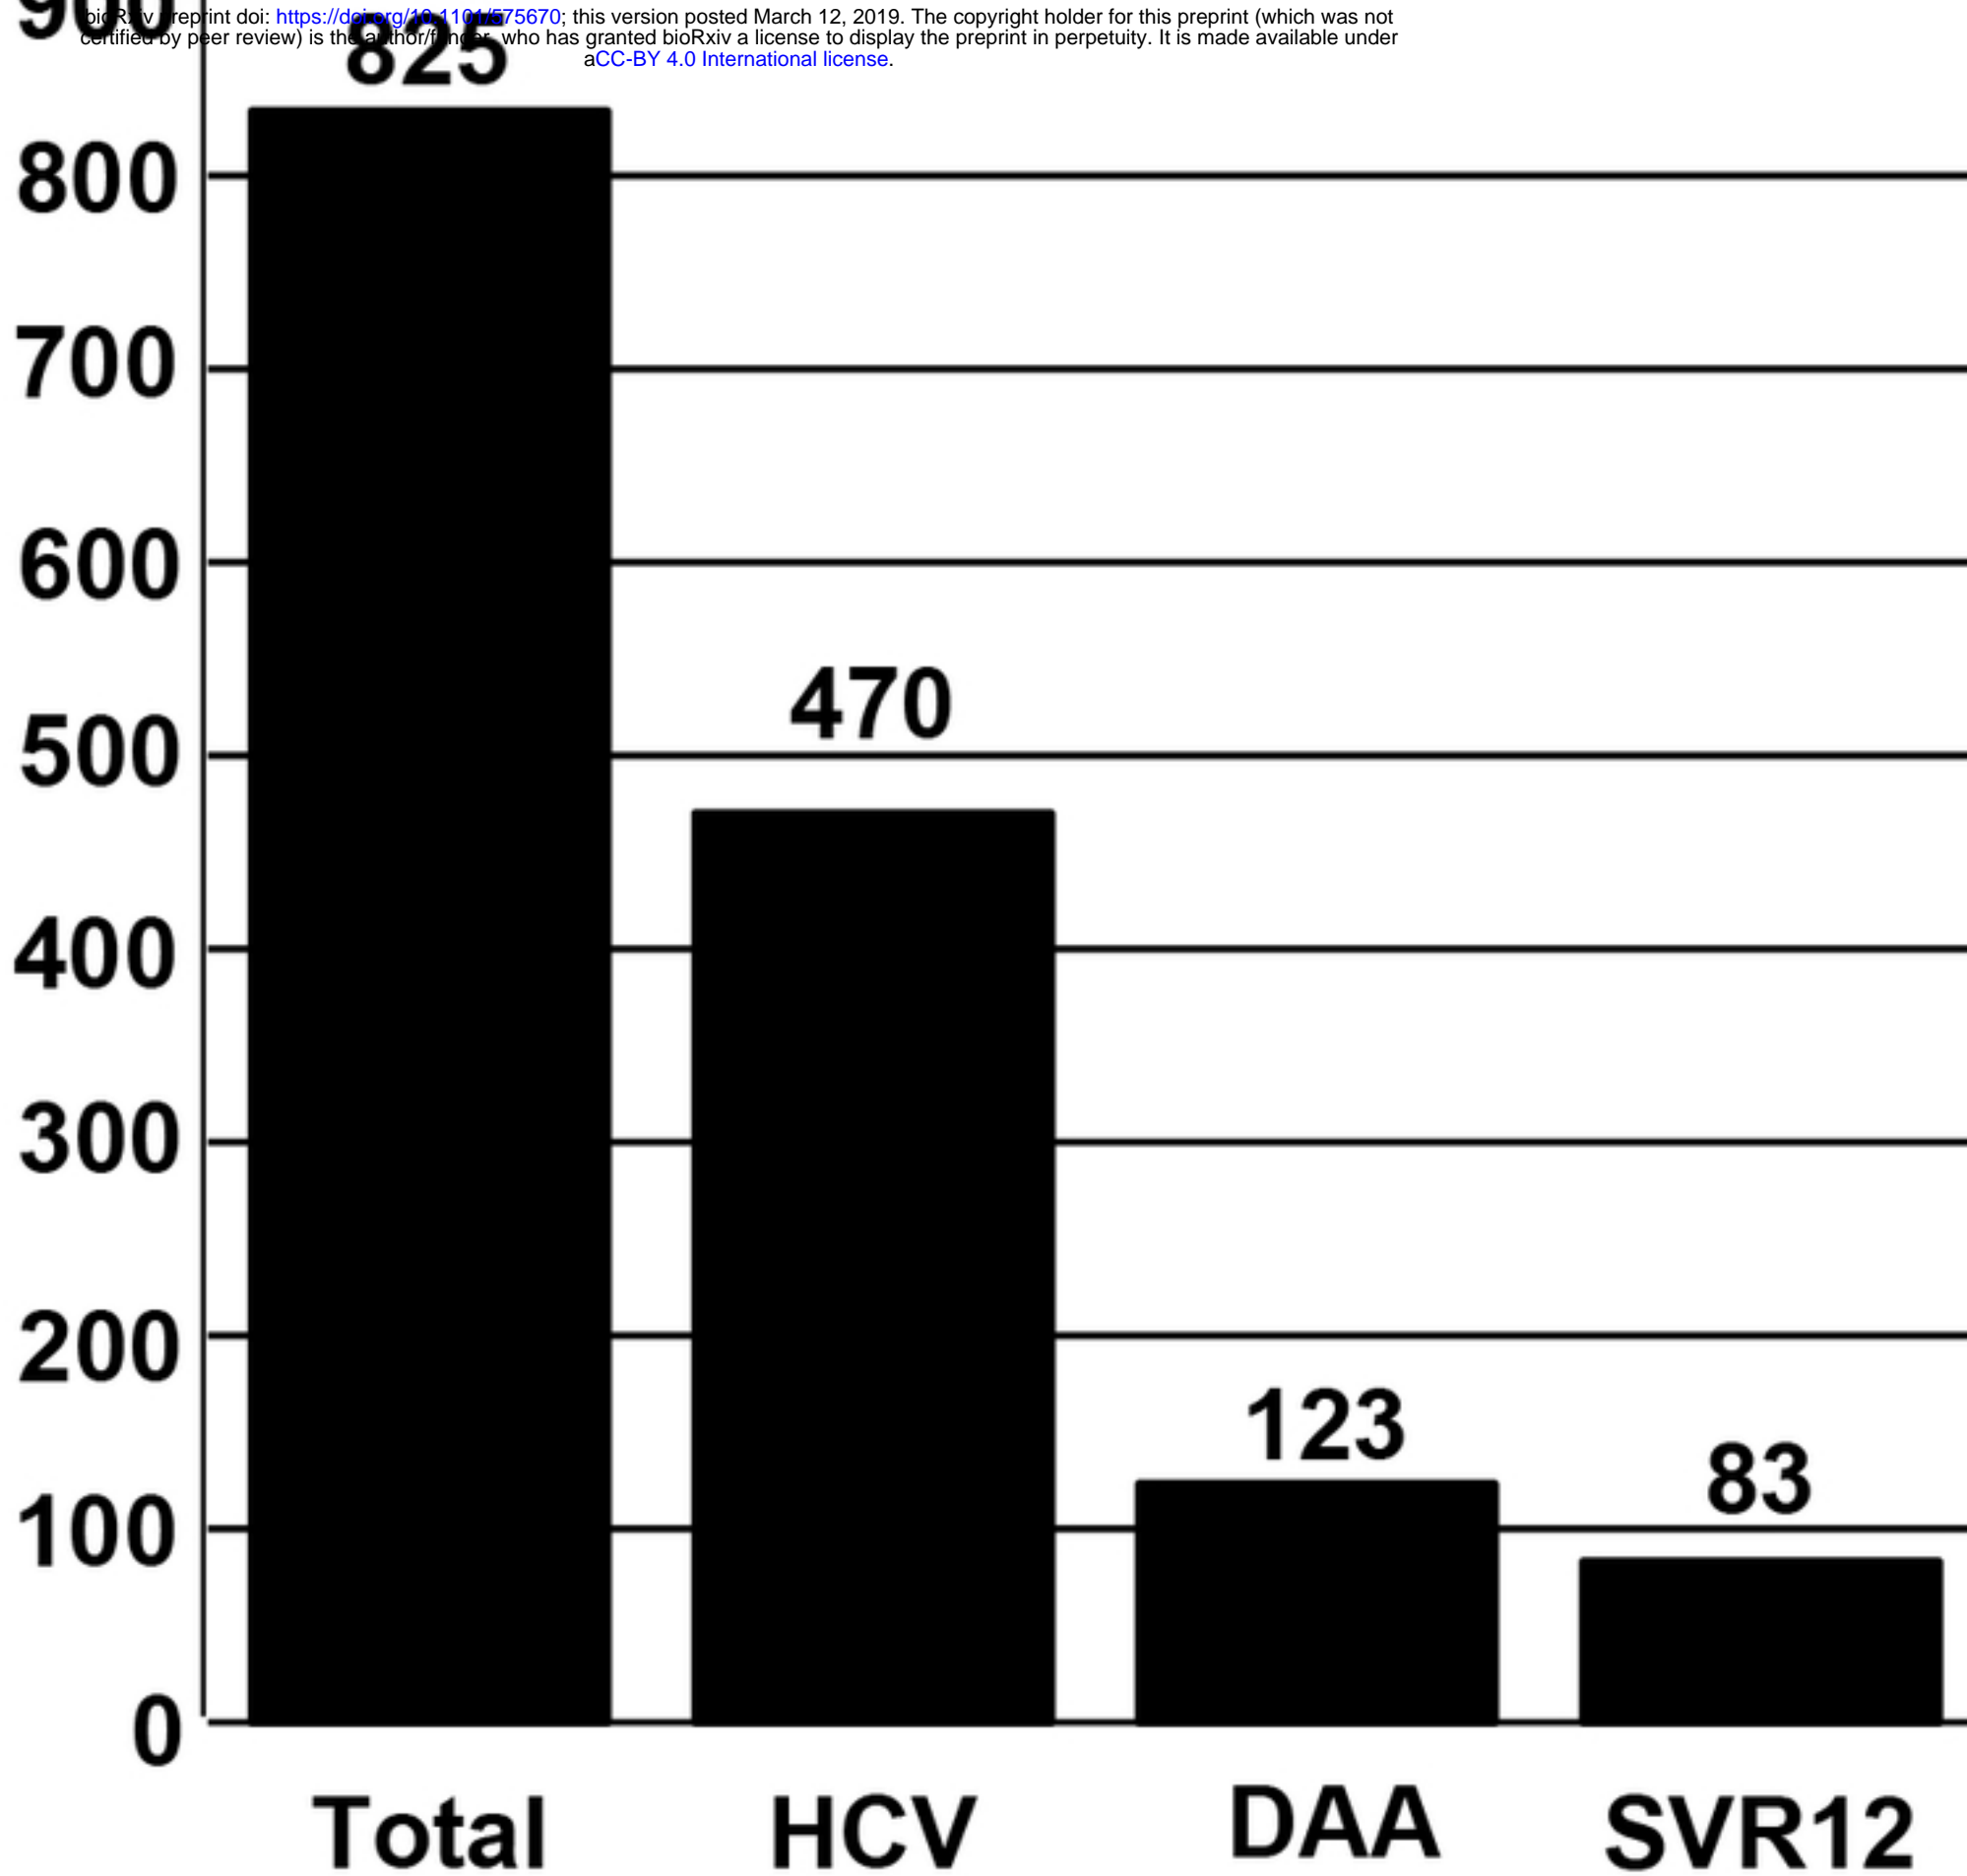

Figure 1b

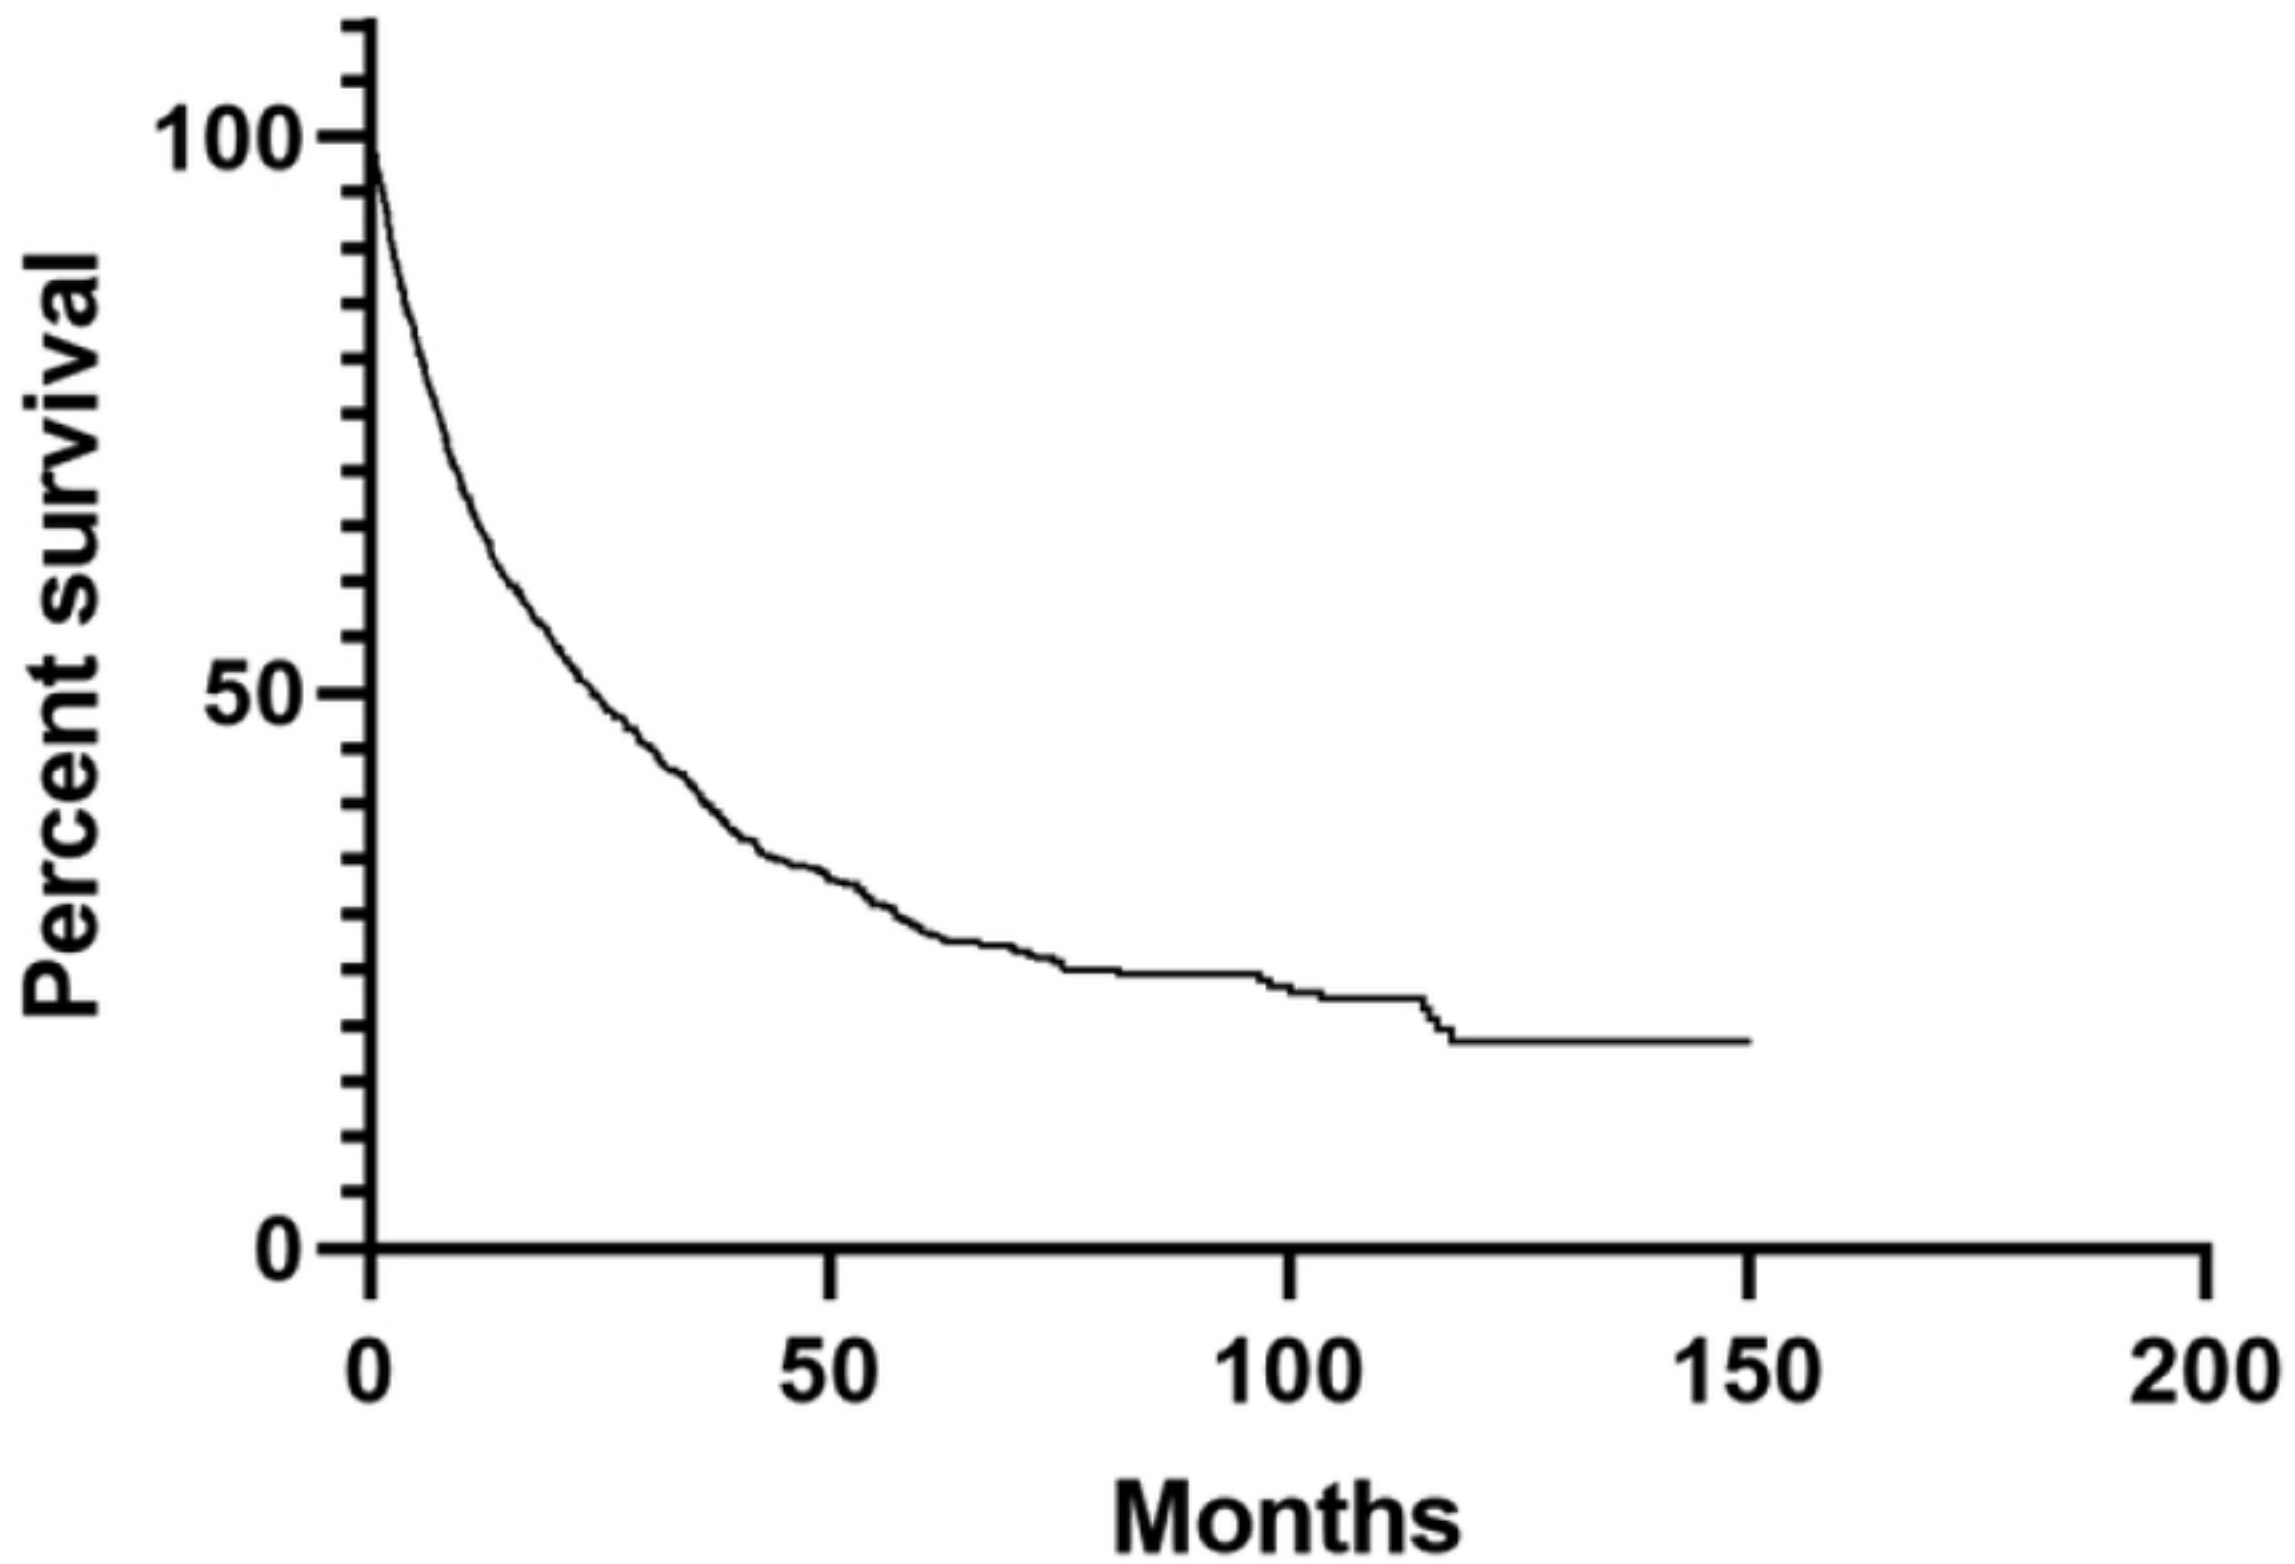

Figure 2a

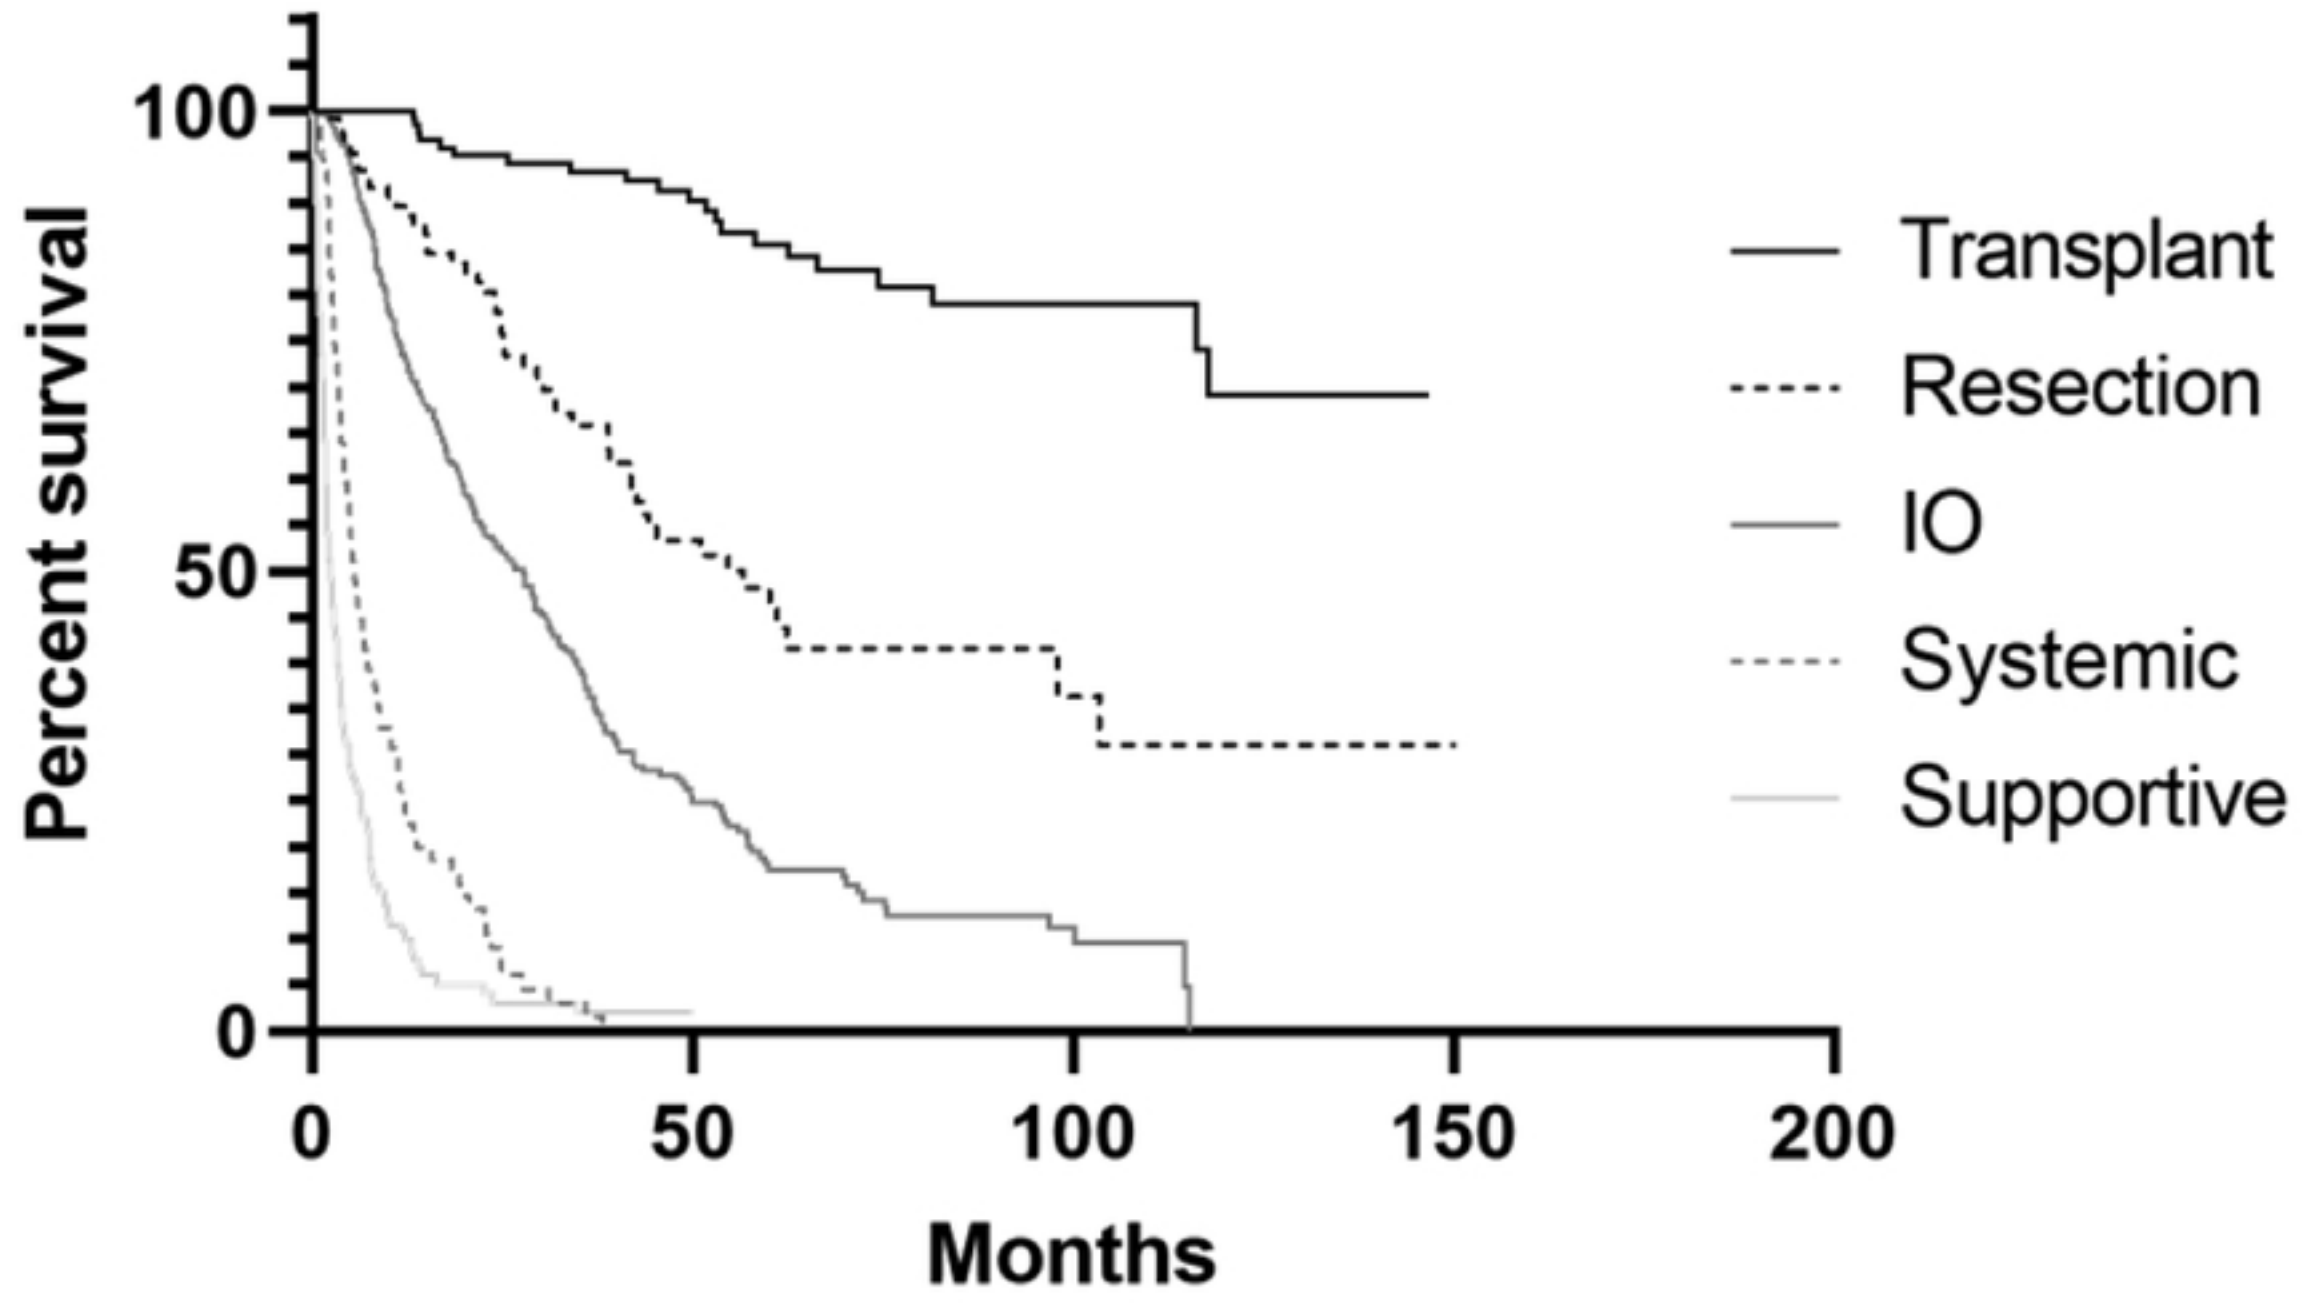

Figure 2b

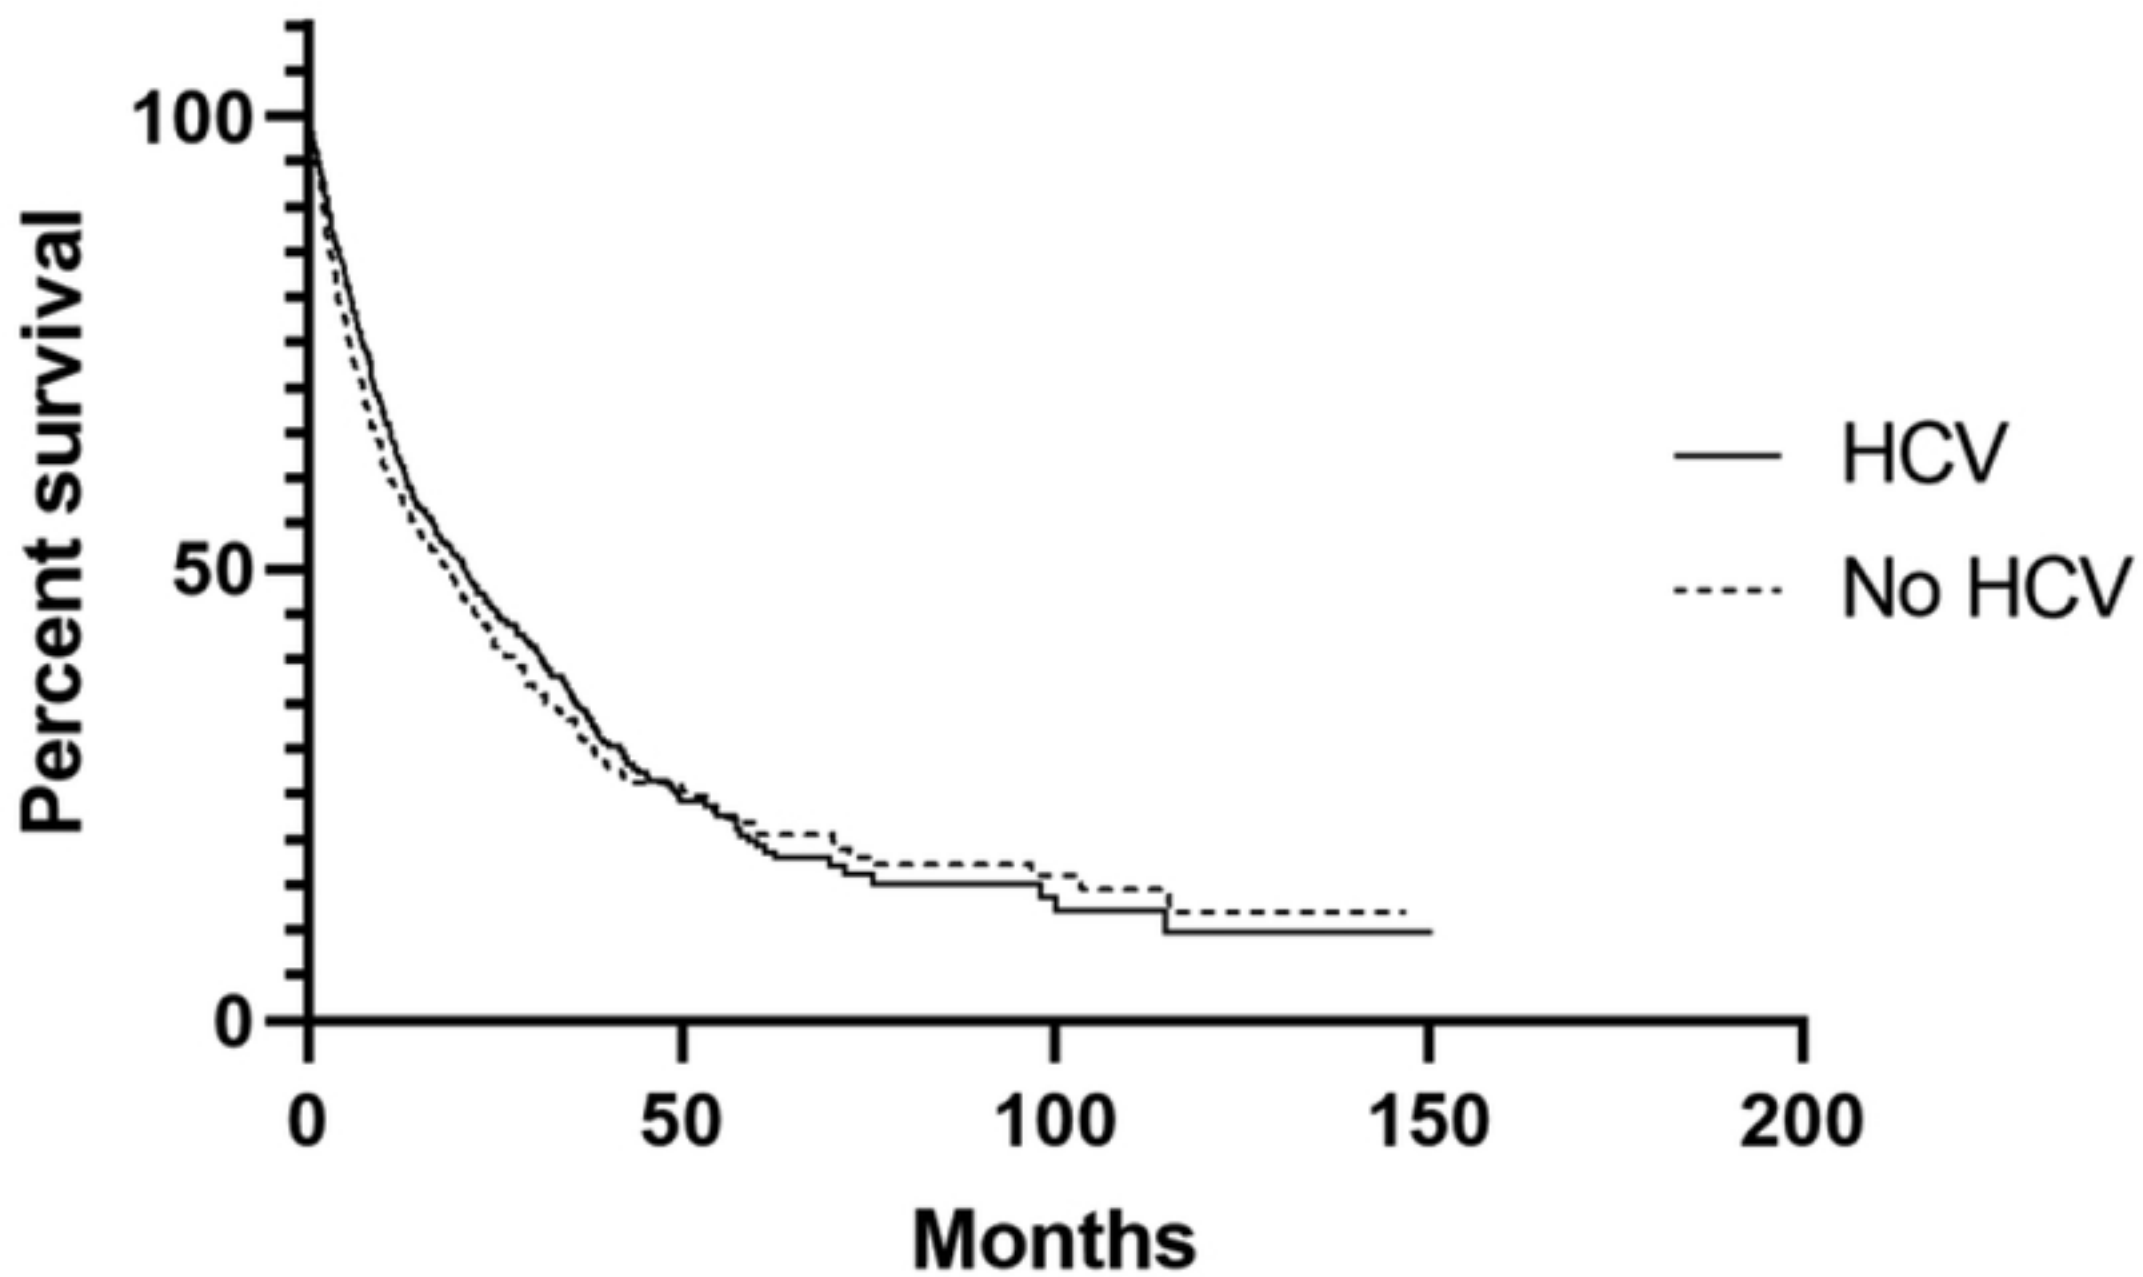

Figure 3a



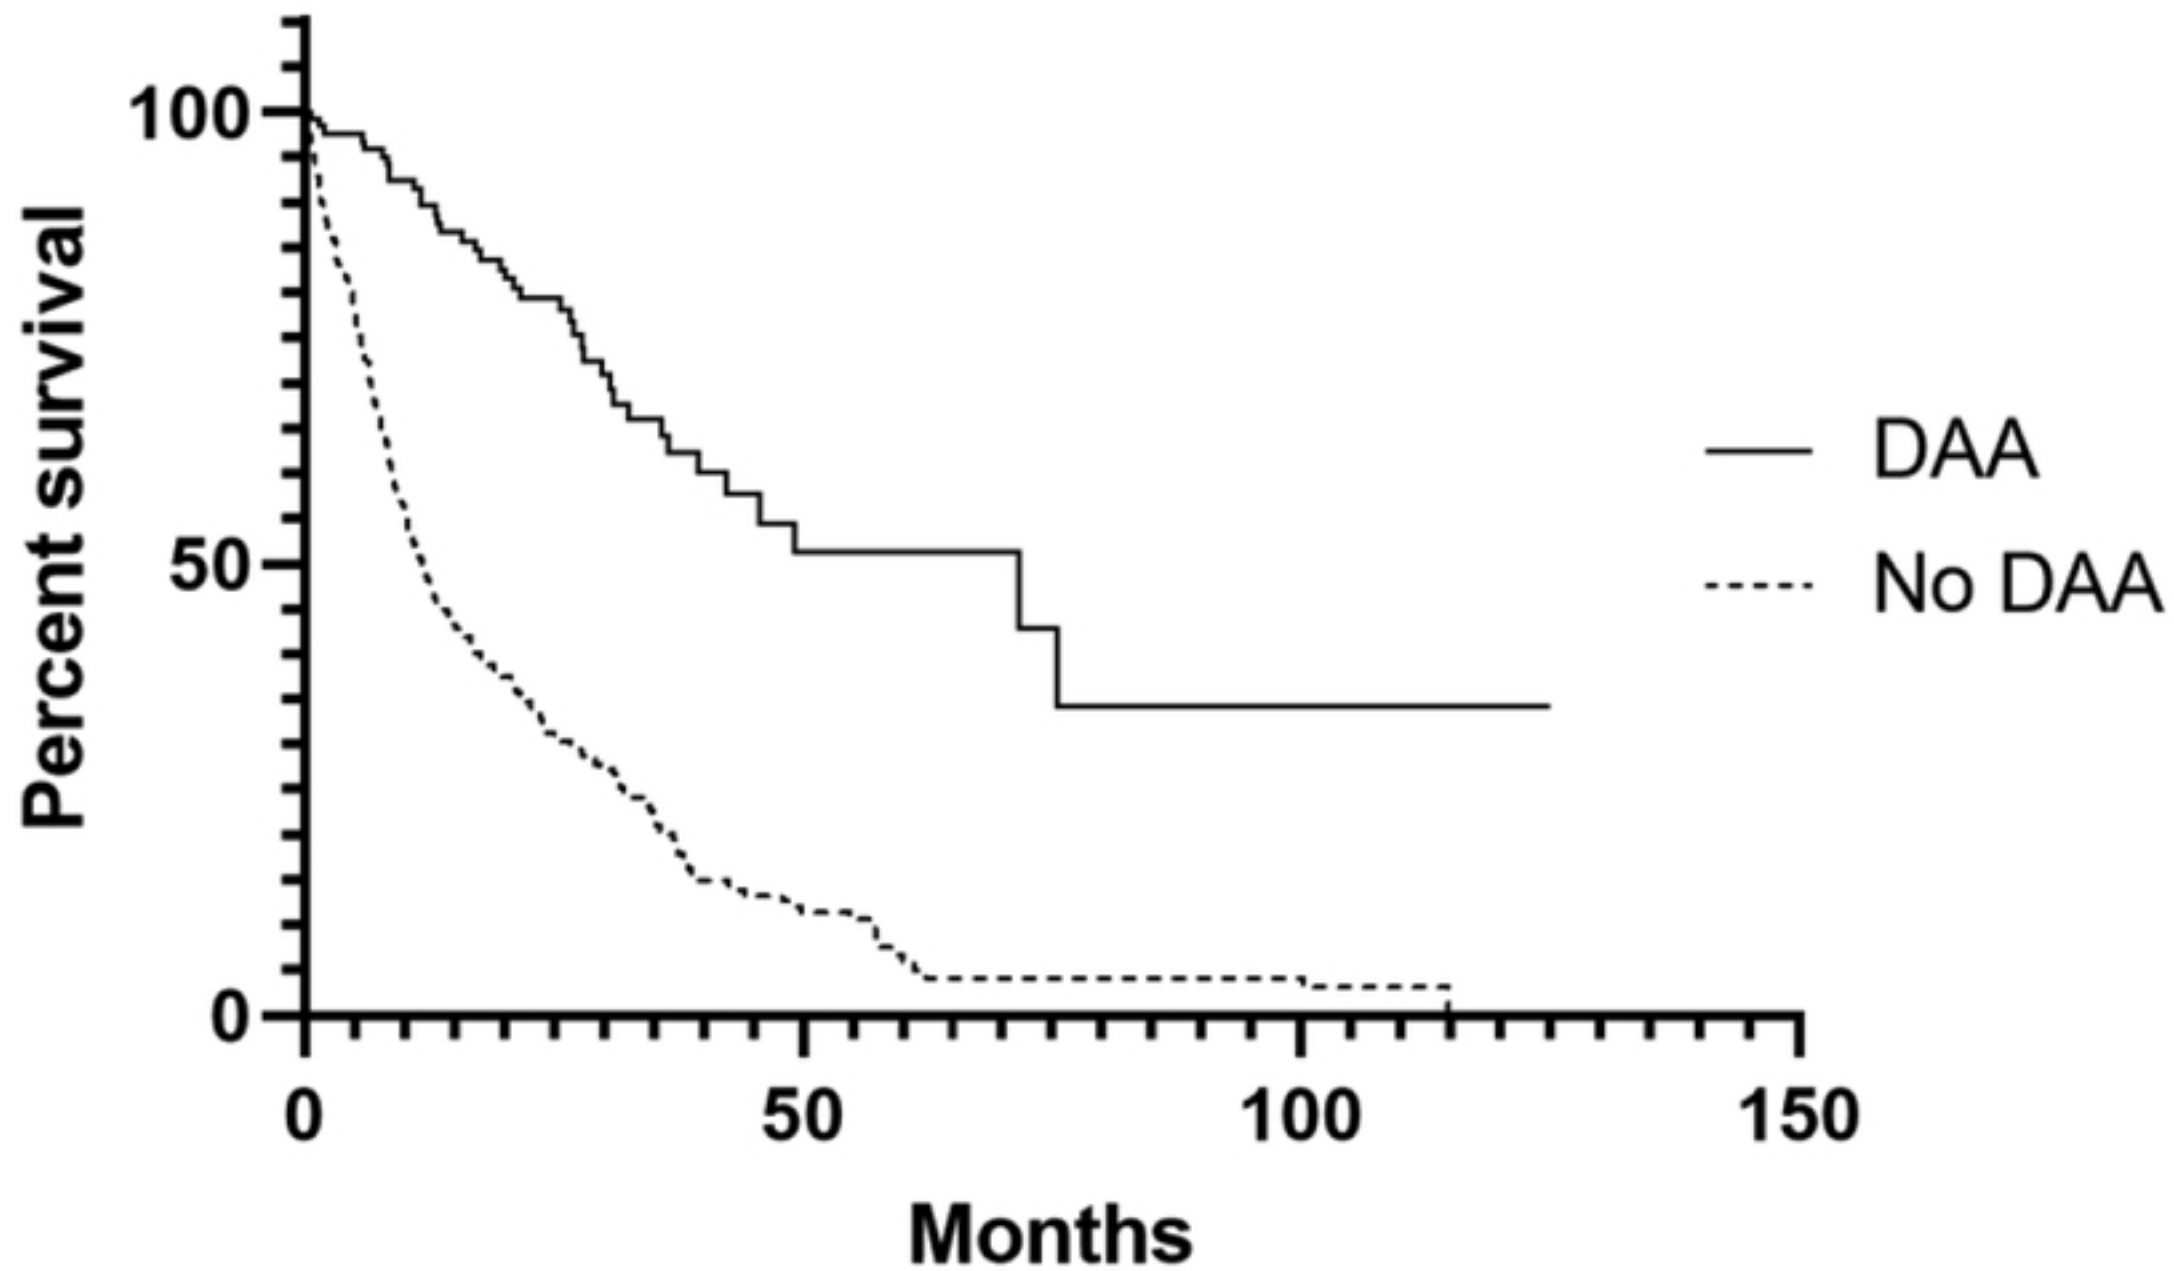

Figure 3b

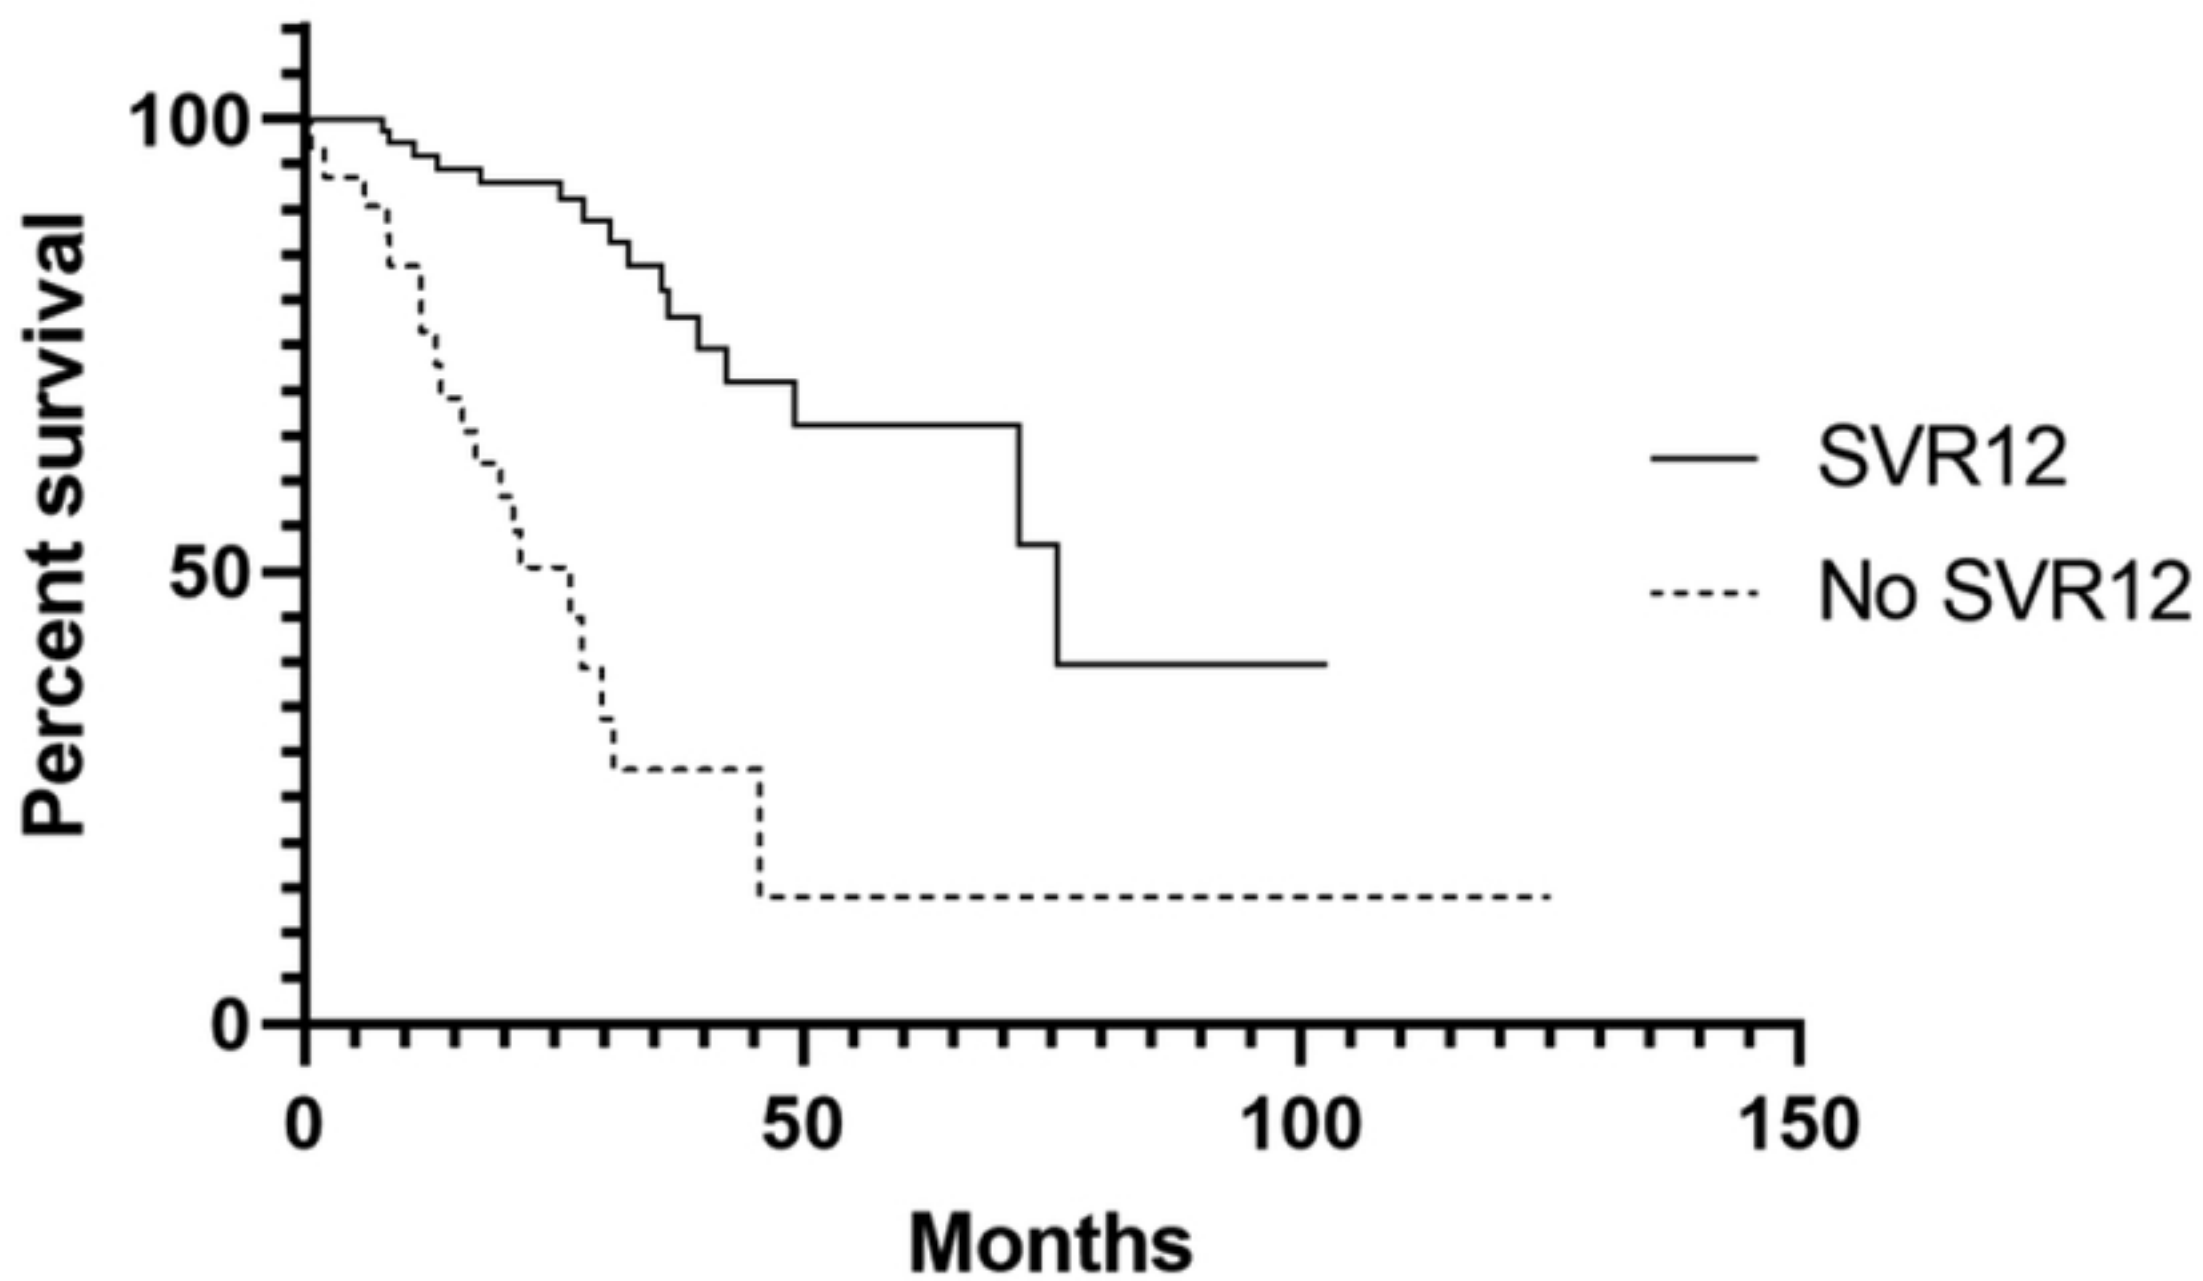

Figure 3c

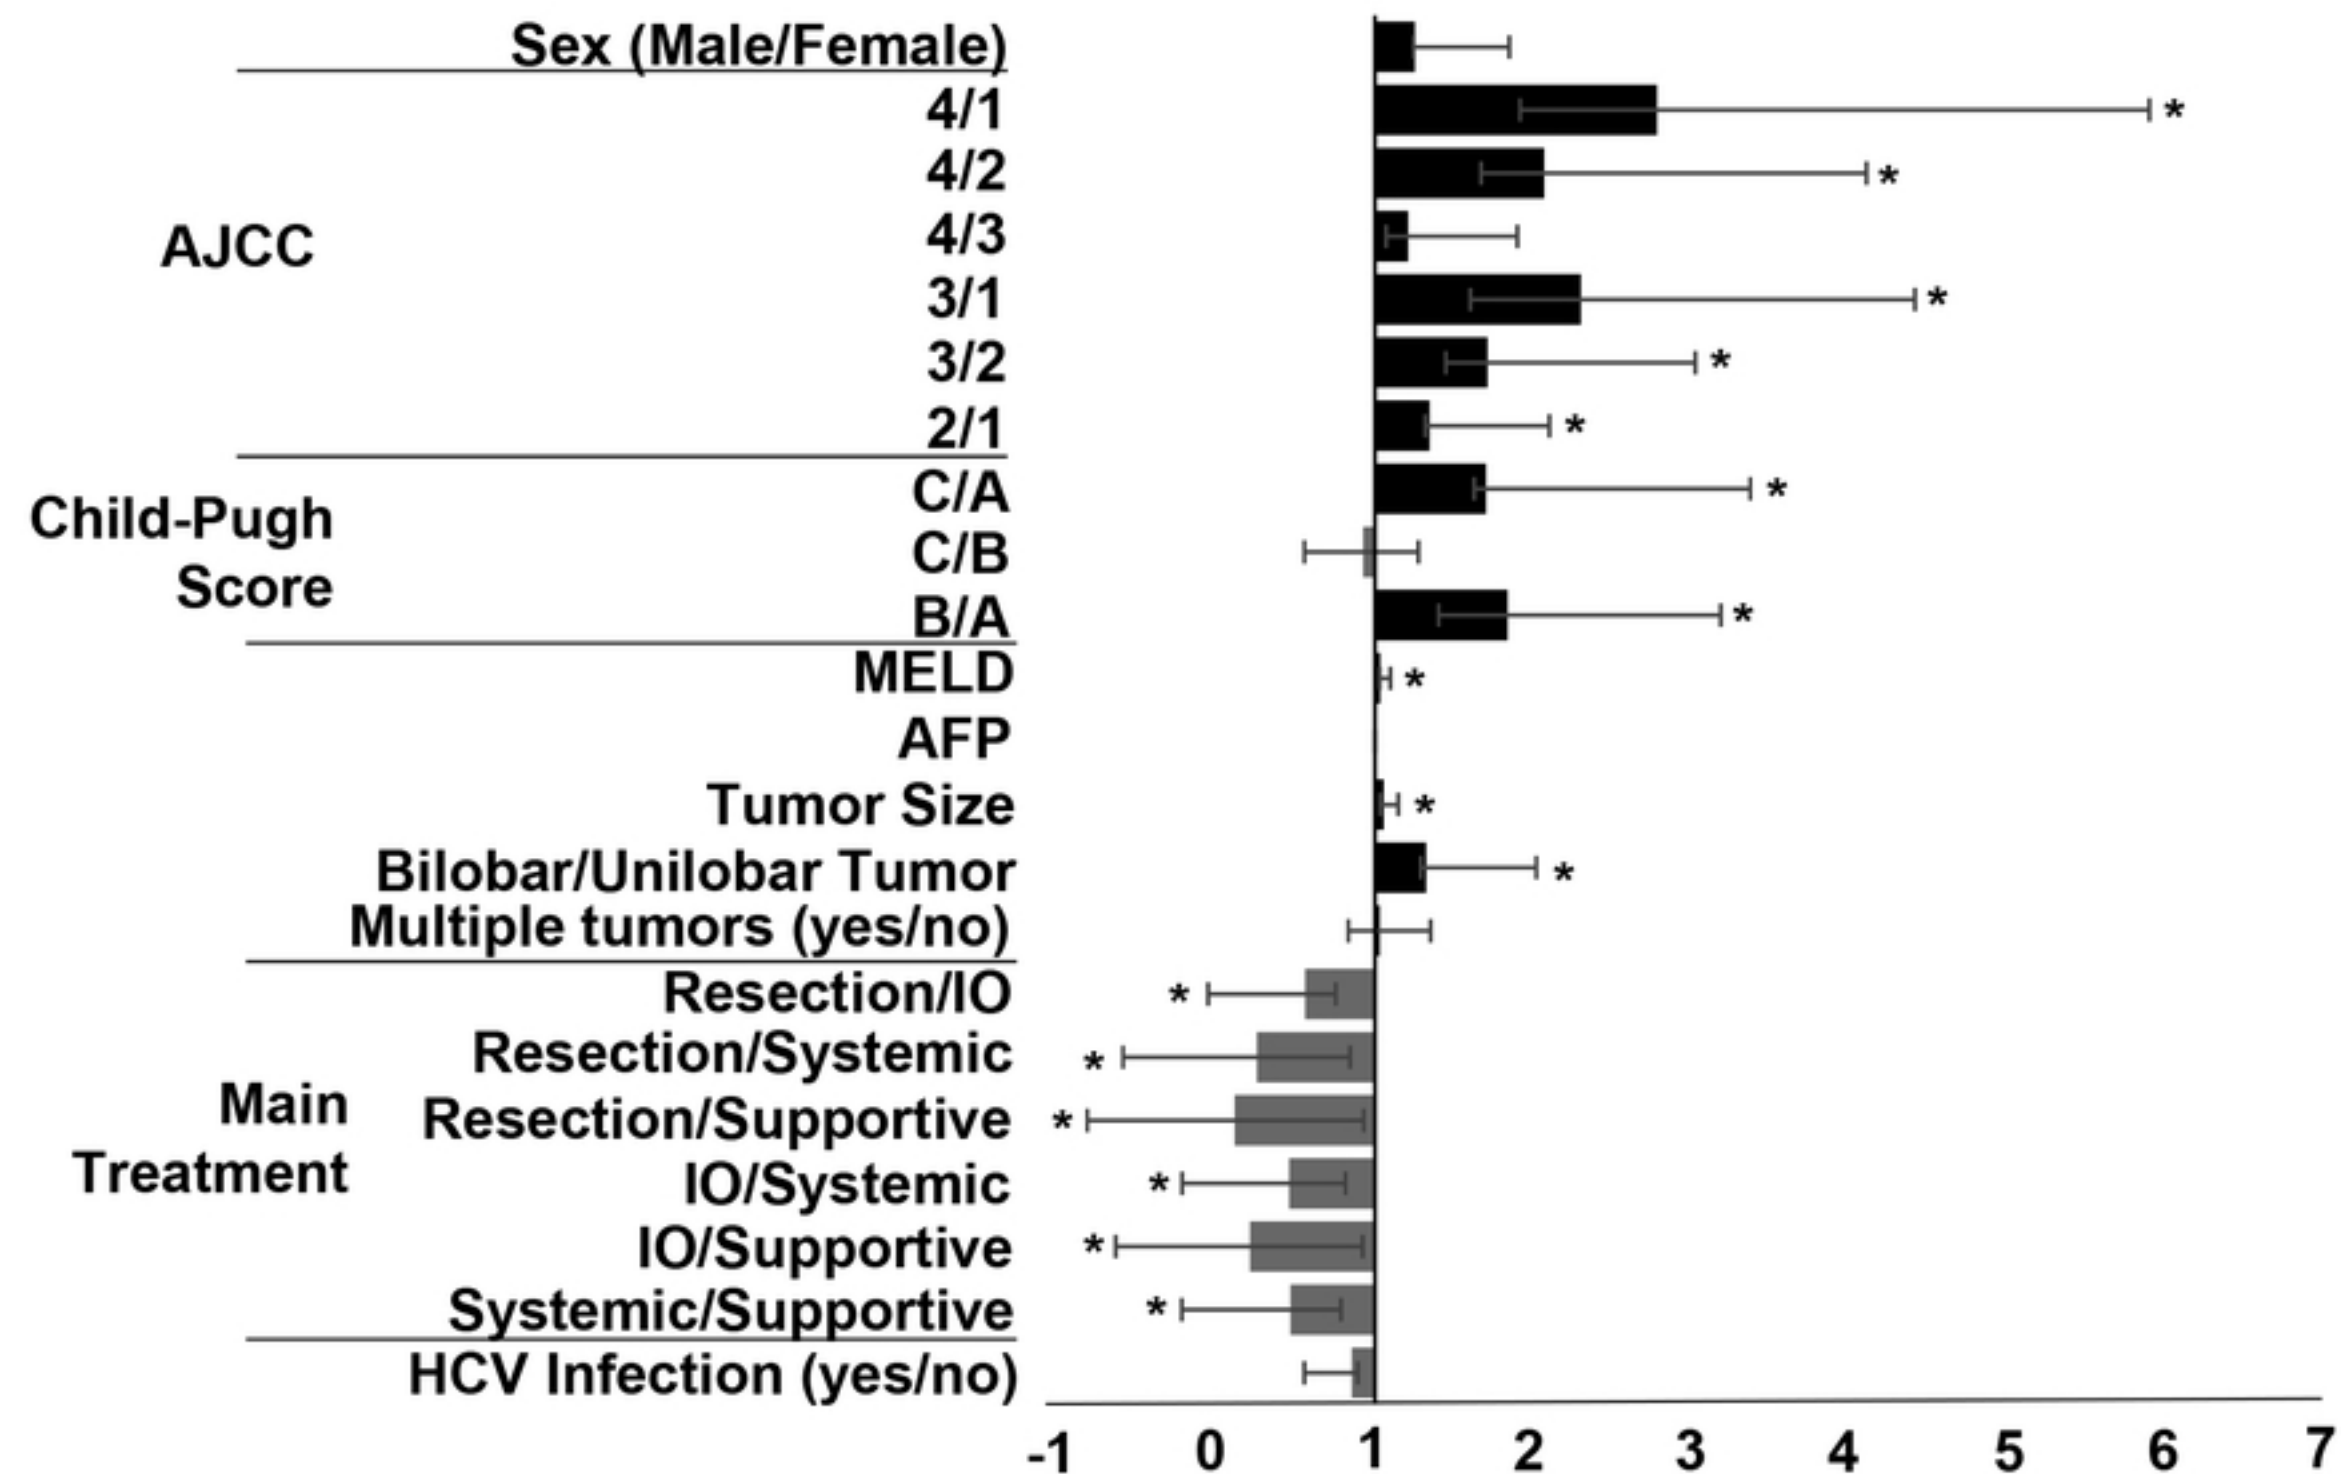

Figure 4a

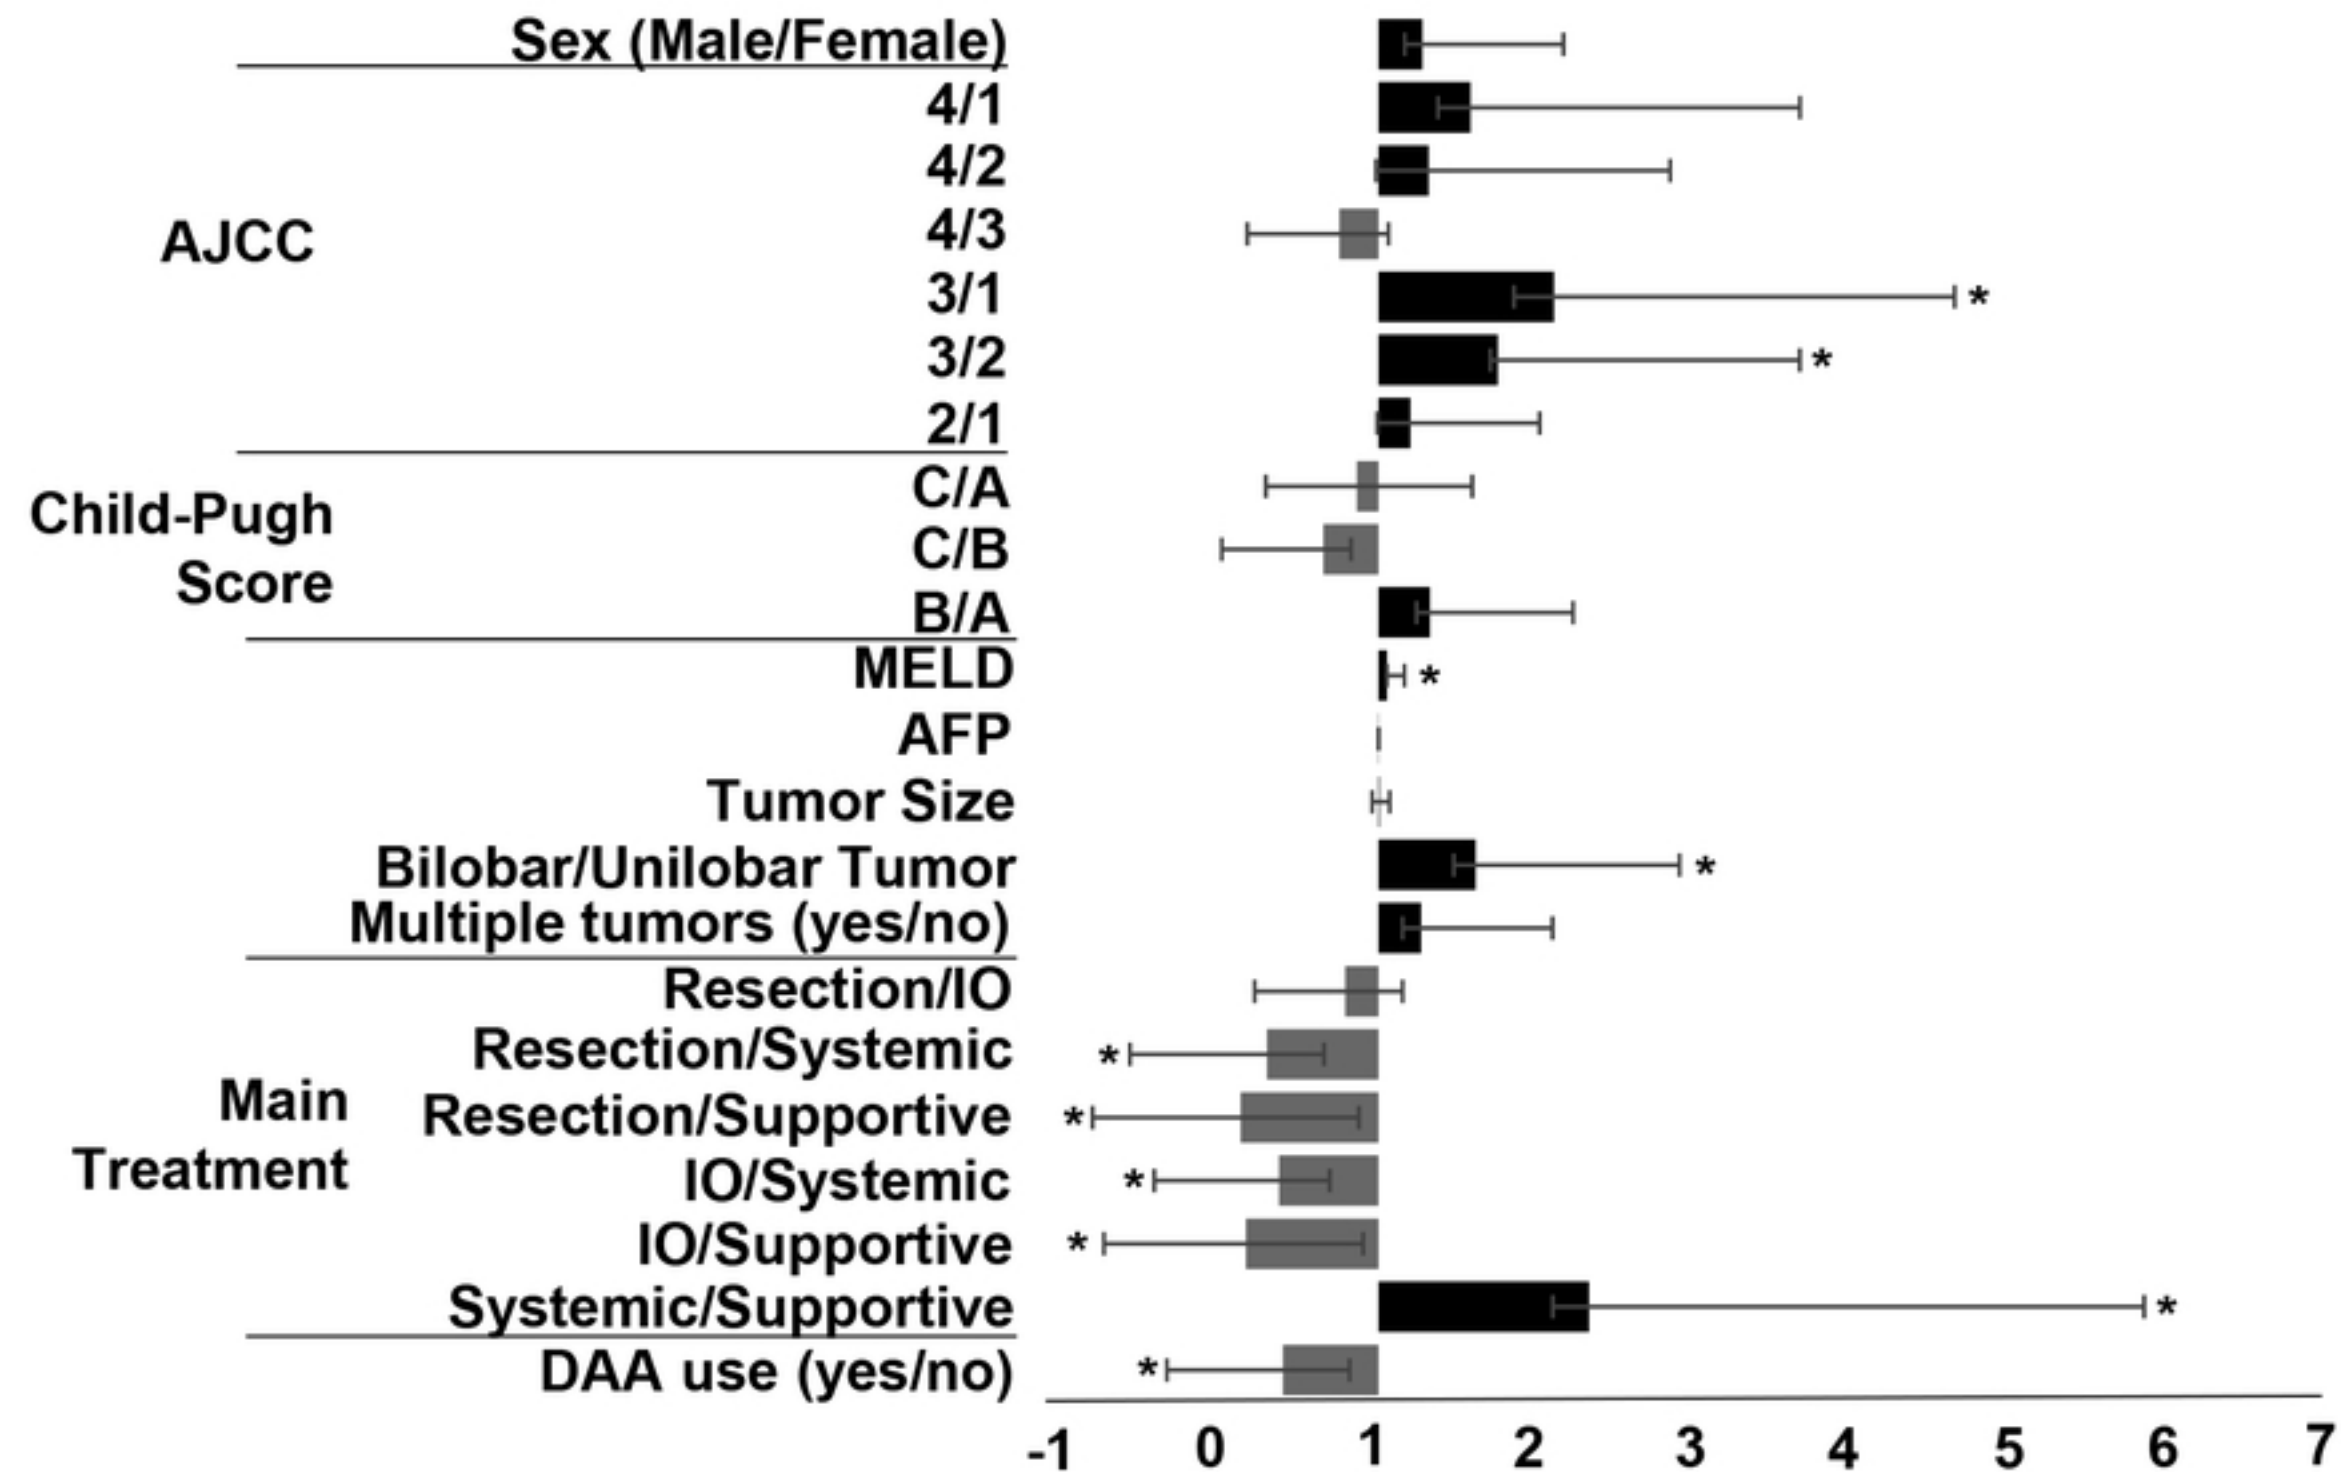

Figure 4b
